# Supplementary material for: [4+2]-Annulation of prop-2-ynylsulfonium salts and N-substituted pyrrole-2-carboxaldehydes: access to indolizines containing a thioether group
Source: Royal Society of Chemistry journal article supplement (doi:10.1039/d1nj04079k), 2021-12-14

## *Supporting Information*

### **[4+2]-Annulation of Prop-2-ynylsulfonium Salts and *N*-substituted pyrrole-2-carboxaldehydes: Access to Indolizines Containing a Thioether Group**

Liping Fu<sup>a, †</sup>, Jing Wang<sup>b, †</sup>, Xiaojuan Chen<sup>b, †</sup>, Tao Shi<sup>b</sup>, Zhanying Shao<sup>c</sup>, Jinbai Chen<sup>a</sup>, Chongmei Tian<sup>a</sup>, Zhongdong Zhou<sup>a, \*</sup>, Huajian Zhu<sup>b, \*</sup>, Jiankang Zhang<sup>b, \*</sup>

<sup>a</sup> *Department of Pharmacy, Shaoxing TCM Hospital Affiliated to Zhejiang Chinese Medical University, Shaoxing, Zhejiang 312000, PR China*

<sup>b</sup> *School of Medicine, Zhejiang University City College, Hangzhou, Zhejiang 310015, PR China*

<sup>c</sup> *Zhejiang Yongtai Technology Co., Ltd., Taizhou, Zhejiang 317016, PR China*

#### **Table of contents**

1. Experimental (General procedures and characterization data for target compounds)
2. <sup>1</sup>H and <sup>13</sup>C NMR spectra for target products

## 1. Experimental

**General.** All reactions were carried out in test tube under air atmosphere. Chemicals were purchased from commercial suppliers and used without further purification. Purification of reaction products were carried out by chromatography using silica gel (200-300 mesh). High resolution MS data were recorded on Agilent 6200 Series TOF spectrometer. NMR spectra were recorded on AVIII for  $^1\text{H}$  NMR at 500/400 MHz and for  $^{13}\text{C}$  NMR at 125/100 MHz. For  $^1\text{H}$  NMR, tetramethylsilane (TMS) was served as internal standard ( $\delta$ ). The spectra data presented here are reported as follows: chemical shift, integration, multiplicity (s = singlet, d = doublet, t = triplet, q = quartet, m = multiplet), and coupling constant(s) in Hertz. For  $^{13}\text{C}$  NMR TMS was used as internal standard and spectra were obtained with complete proton decoupling.

### General procedure for the synthesis of *N*-substituted pyrrole-2-carboxaldehydes **1**

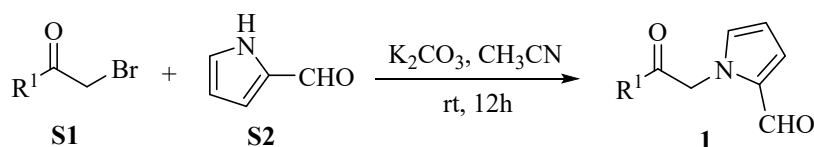

To a mixture of **S2** (5 mmol, 0.48 g) and  $\text{K}_2\text{CO}_3$  (6 mmol, 0.83 g) in 40 mL of  $\text{CH}_3\text{CN}$  were added corresponding  $\alpha$ -bromo-substituted ketone (5.5 mmol), and the reaction was proceeded at room temperature for 12 h. After completion, the mixture was filtered and dried under reduced pressure. Then the residue was diluted with 30 ml of ethyl acetate and washed with water for 3 times. The organic layer was dried with sodium sulfate, concentrated and purified by silica gel chromatography to obtain **1**.

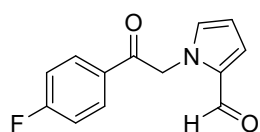

#### 1-(2-(4-fluorophenyl)-2-oxoethyl)-1H-pyrrole-2-carbaldehyde (**1d**)

$^1\text{H}$  NMR (500 MHz,  $\text{CDCl}_3$ )  $\delta$  9.51 (1H, d,  $J = 1.0$  Hz), 8.06 – 8.02 (2H, m), 7.21 – 7.17 (2H, m), 7.04 (1H, dd,  $J = 4.0, 1.5$  Hz), 6.96 (1H, t,  $J = 1.0$  Hz), 6.36 (1H, dd,  $J = 4.0, 2.5$  Hz), 5.77 (2H, s).

HRMS calcd for  $\text{C}_{13}\text{H}_{10}\text{FNO}_2 + \text{H}^+$ : 232.0876, found: 232.0874.

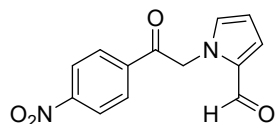

1-(2-(4-nitrophenyl)-2-oxoethyl)-1H-pyrrole-2-carbaldehyde (**1e**)

$^1\text{H NMR}$  (400 MHz,  $\text{CDCl}_3$ )  $\delta$  9.50 (1H, d,  $J = 1.0$  Hz), 8.39 – 8.36 (2H, m), 7.58 – 7.55 (2H, m), 7.07 (1H, dd,  $J = 4.0, 1.6$  Hz), 6.98 (1H, t,  $J = 1.0$  Hz), 6.39 (1H, dd,  $J = 4.0, 2.8$  Hz), 5.78 (2H, s).

HRMS calcd for  $\text{C}_{13}\text{H}_{10}\text{N}_2\text{O}_4 + \text{H}^+$ : 259.0713, found: 259.0715.

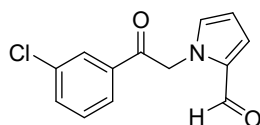

1-(2-(3-chlorophenyl)-2-oxoethyl)-1H-pyrrole-2-carbaldehyde (**1h**)

$^1\text{H NMR}$  (500 MHz,  $\text{CDCl}_3$ )  $\delta$  9.51 (1H, d,  $J = 1.0$  Hz), 7.97 (1H, t,  $J = 1.5$  Hz), 7.89 (1H, dt,  $J = 7.5, 1.0$  Hz), 7.62-7.59 (1H, m), 7.47 (1H, t,  $J = 8.0$  Hz), 7.05 (1H, dd,  $J = 4.0, 1.5$  Hz), 6.95 (1H, t,  $J = 1.0$  Hz), 6.37 (1H, dd,  $J = 4.0, 2.5$  Hz), 5.76 (2H, s). HRMS calcd for  $\text{C}_{13}\text{H}_{10}\text{ClNO}_2 + \text{H}^+$ :

248.0473, found: 248.0470.

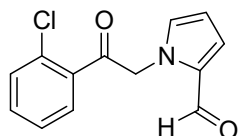

1-(2-(2-chlorophenyl)-2-oxoethyl)-1H-pyrrole-2-carbaldehyde (**1j**)

$^1\text{H NMR}$  (500 MHz,  $\text{CDCl}_3$ )  $\delta$  9.51 (1H, d,  $J = 1.0$  Hz), 7.77 (1H, dt,  $J = 7.5, 1.0$  Hz), 7.46 (1H, d,  $J = 1.0$  Hz), 7.45 (1H, d,  $J = 1.0$  Hz), 7.41- 7.38 (1H, m), 7.04 (1H, dd,  $J = 4.0, 2.0$  Hz), 7.00 (1H, t,  $J = 1.0$  Hz), 6.36 (1H, dd,  $J = 4.0, 2.5$  Hz), 5.65 (2H, s). HRMS calcd for  $\text{C}_{13}\text{H}_{10}\text{ClNO}_2 + \text{H}^+$ :

248.0473, found: 248.0470.

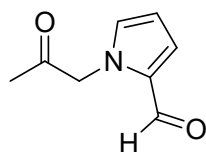

1-(2-oxopropyl)-1H-pyrrole-2-carbaldehyde (**1p**)

$^1\text{H}$  NMR (500 MHz,  $\text{CDCl}_3$ )  $\delta$  9.50 (1H, d,  $J = 1.0$  Hz), 7.00 (1H, dd,  $J = 4.0, 2.0$  Hz), 6.87 (1H, t,  $J = 1.0$  Hz), 6.32 (1H, dd,  $J = 4.0, 2.5$  Hz), 5.10 (2H, s), 2.24 (3H, s). HRMS calcd for  $\text{C}_8\text{H}_9\text{NO}_2 + \text{H}^+$ : 152.0706, found: 152.0708.

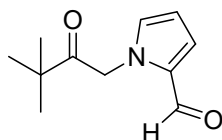

1-(3,3-dimethyl-2-oxobutyl)-1H-pyrrole-2-carbaldehyde (**1q**)

$^1\text{H}$  NMR (500 MHz,  $\text{CDCl}_3$ )  $\delta$  9.47 (1H, d,  $J = 1.0$  Hz), 6.98 (1H, dd,  $J = 4.0, 1.5$  Hz), 6.83 (1H, t,  $J = 1.0$  Hz), 6.30 (1H, dd,  $J = 4.0, 2.5$  Hz), 5.36 (2H, s), 1.28 (9H, s). HRMS calcd for  $\text{C}_{11}\text{H}_{15}\text{NO}_2 + \text{H}^+$ : 194.1176, found: 194.1174.

#### General procedure for the synthesis of prop-2-ynyl-substituted sulfonium salt **2**

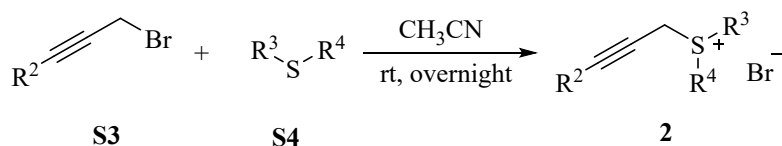

A mixture of bromopropyne (20 mmol) and corresponding thioether (40 mmol) was stirred in 50 mL of  $\text{CH}_3\text{CN}$  at room temperature overnight. The reaction mixture was filtered, and the filter cake was washed with 30 ml of petroleum ether which was dried under vacuum to obtain **2** as white solid.

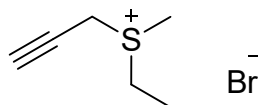

ethyl(methyl)(prop-2-yn-1-yl)sulfonium bromide(**2b**)

$^1\text{H}$  NMR (400 MHz, DMSO)  $\delta$  4.80 (2H, d,  $J = 2.0$  Hz), 3.98 (1H, s), 3.45 (2H, q,  $J = 8.0$  Hz), 3.01 (3H, s), 1.35 (3H, t,  $J = 7.2$  Hz). HRMS calcd for  $\text{C}_6\text{H}_{11}\text{S}^+$ : 115.0576, found: 115.0574.

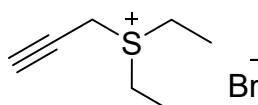

diethyl(prop-2-yn-1-yl)sulfonium bromide(**2c**)

$^1\text{H}$  NMR (400 MHz, DMSO)  $\delta$  4.57 (2H, d,  $J = 2.0$  Hz), 3.93 (1H, s), 3.45 (4H, q,  $J = 8.0$  Hz), 1.33(6H, t,  $J = 7.2$  Hz). HRMS calcd for  $\text{C}_7\text{H}_{13}\text{S}^+$ : 129.0732, found: 129.0730.

### Additional reaction optimization

Supplementary Table 1. Additional optimization of reaction conditions<sup>a</sup>

| Entry | Solvent                      | Base                            | Temp (°C) | Ratio (1a: 2a: base) | Yield (%) <sup>b</sup> |
|-------|------------------------------|---------------------------------|-----------|----------------------|------------------------|
| 1     | i-PrOH                       | DABCO                           | 0         | 1: 2: 3              | 14%                    |
| 2     | MeOH: BTF (8:2)              | DABCO                           | 0         | 1: 2: 3              | 4%                     |
| 3     | EtOH: H <sub>2</sub> O (8:2) | DABCO                           | 0         | 1: 2: 3              | 6%                     |
| 4     | EtOH: BTF (8:2)              | CS <sub>2</sub> CO <sub>3</sub> | 0         | 1: 2: 3              | Trace                  |
| 5     | EtOH: BTF (8:2)              | Et <sub>3</sub> N               | 0         | 1: 2: 3              | Trace                  |
| 6     | EtOH: BTF (8:2)              | t-BuOK                          | 0         | 1: 2: 3              | Trace                  |
| 7     | EtOH                         | DABCO                           | 0         | 1: 5: 7              | 49%                    |

<sup>a</sup>Reaction conditions unless otherwise specified: 1.0 mmol of **1a**, portionwise addition of **2a** (0.5 equiv per 0.5 h), 10 mL of solvent, 12 h, air. <sup>b</sup>Isolated yields.

### General procedure for the synthesis of target compounds **3**

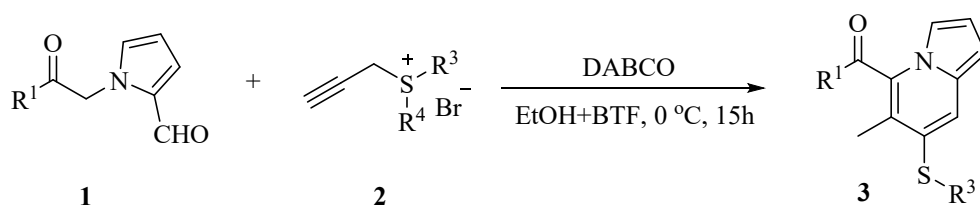

To a solution of corresponding *N*-substituted pyrrole-2-carboxaldehyde **1** (1.0 mmol) in 10 mL of mixed solvent (ethanol : benzotrifluoride = 8:2) was added DABCO (7.0 mmol, 0.78 g) at 0 °C. Then sulfonium salt **2** (5.0 mmol) was successively added (once per 0.5 h, each time for 0.5 equiv), and the reaction was stirred for 12h. After completion, the reaction was filtered. The filtrate was concentrated under reduced pressure to obtain crude residue, which was purified by silica gel column chromatography (petroleum ether: ethyl acetate=100:1) to obtain product **3**.

### The 2D NMR for confirmation of compounds of **3a** and **3g**

According to the chemical shifts and the coupling constants in  $^1\text{H}$  NMR spectra, the signals of the key H-5, H-17, H-16 and H-11 can be identified. As shown in NOESY spectra of **3a**, correlations between H-11 and H-16, H-5 and H-17 were observed, instead of H-11 with H-17 and H-5 with H-16, which indicated that the structure can't be **3a'**. Therefore, the structure of representative product should be **3a**.

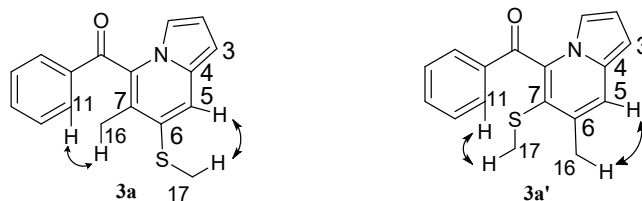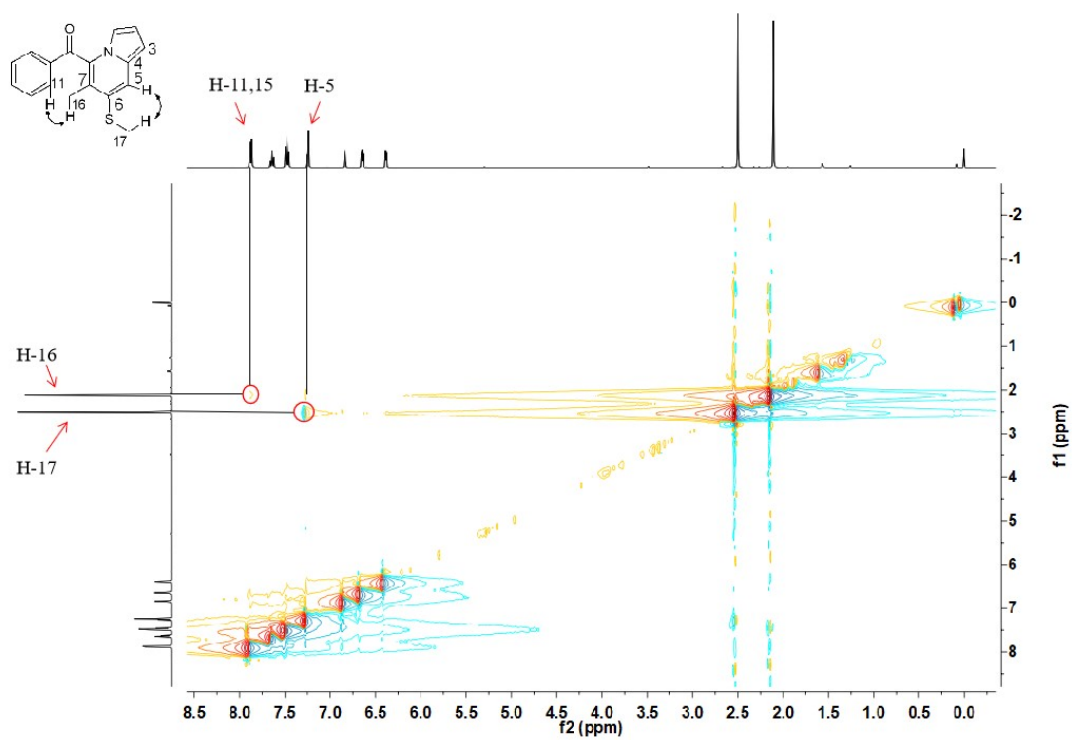

**3a**  $^1\text{H}$ - $^1\text{H}$ -COSY

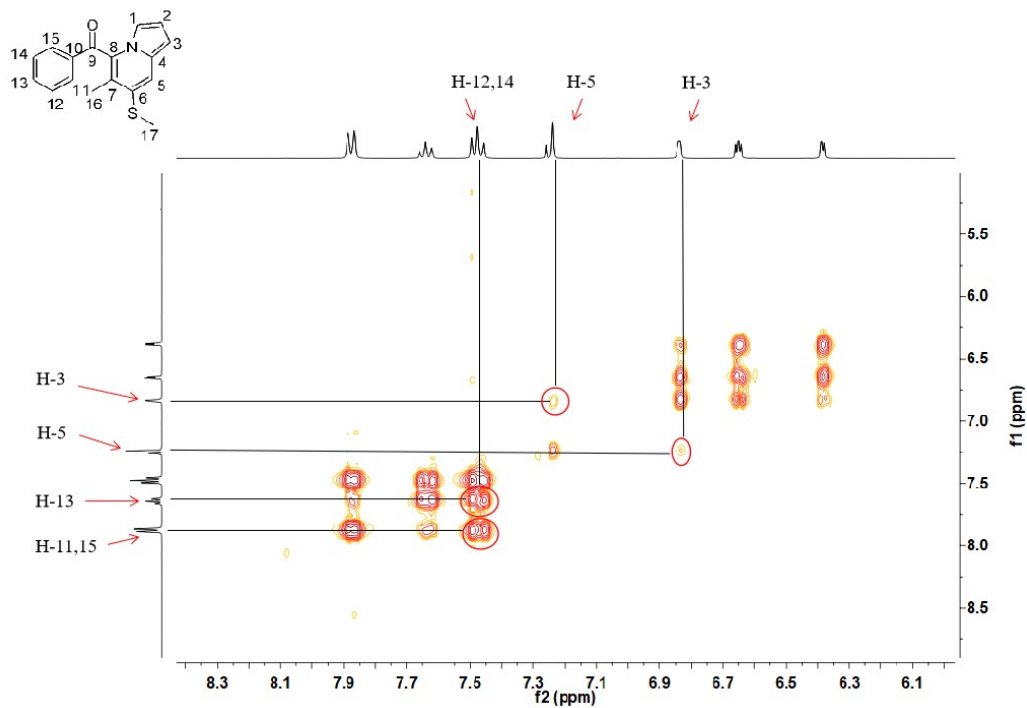

**3a** <sup>1</sup>H-<sup>13</sup>C-HSQC

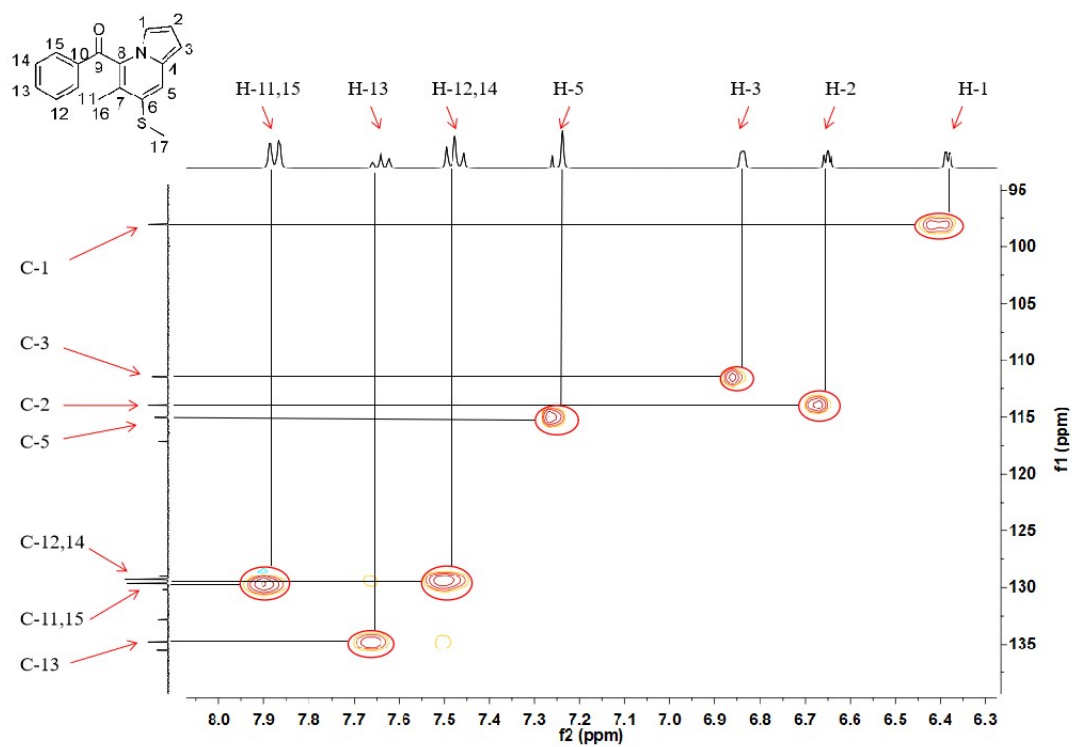

**3a** <sup>1</sup>H-<sup>13</sup>C-HMBC

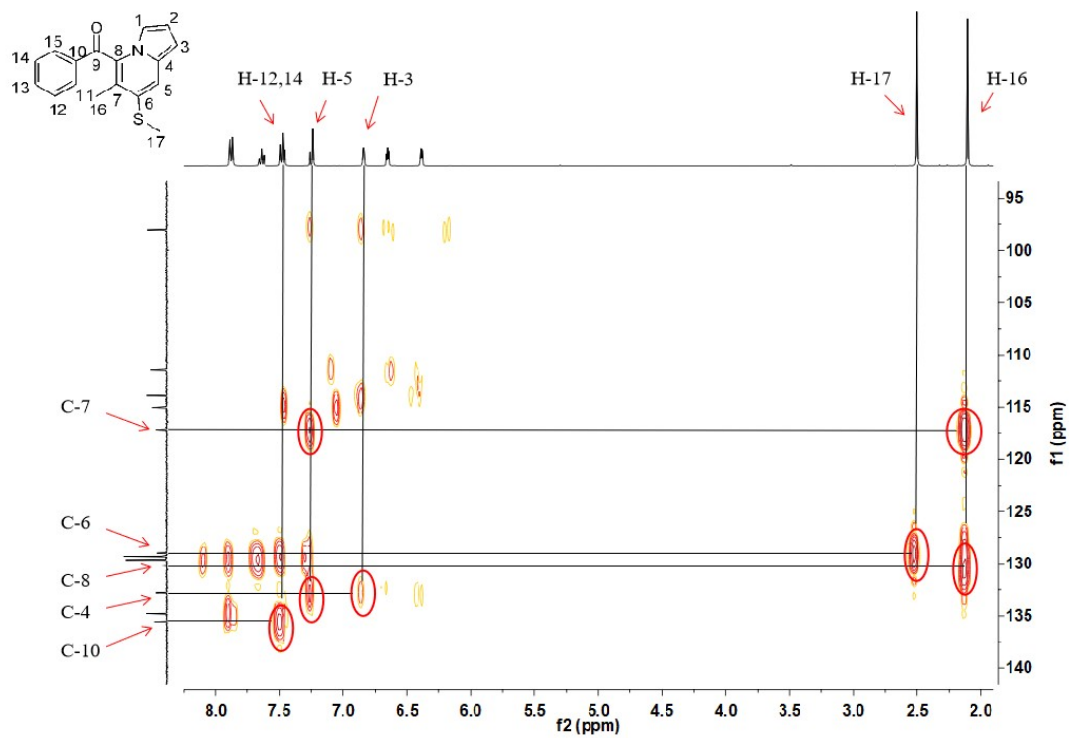

**3g**  $^1\text{H}$ - $^1\text{H}$ -COSY

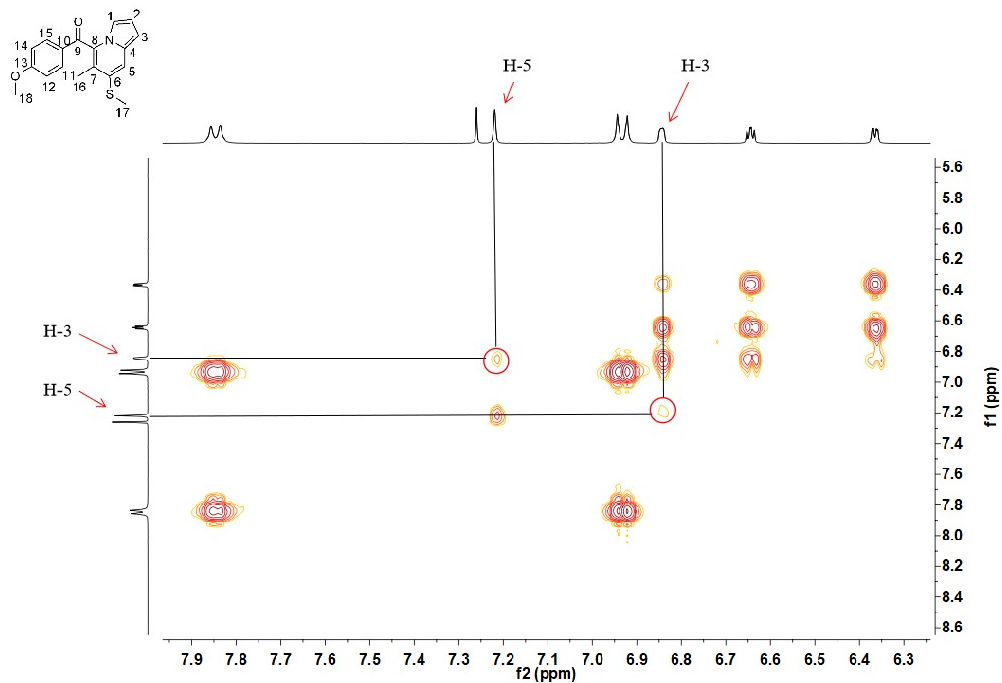

**3g**  $^1\text{H}$ - $^{13}\text{C}$ -HSQC



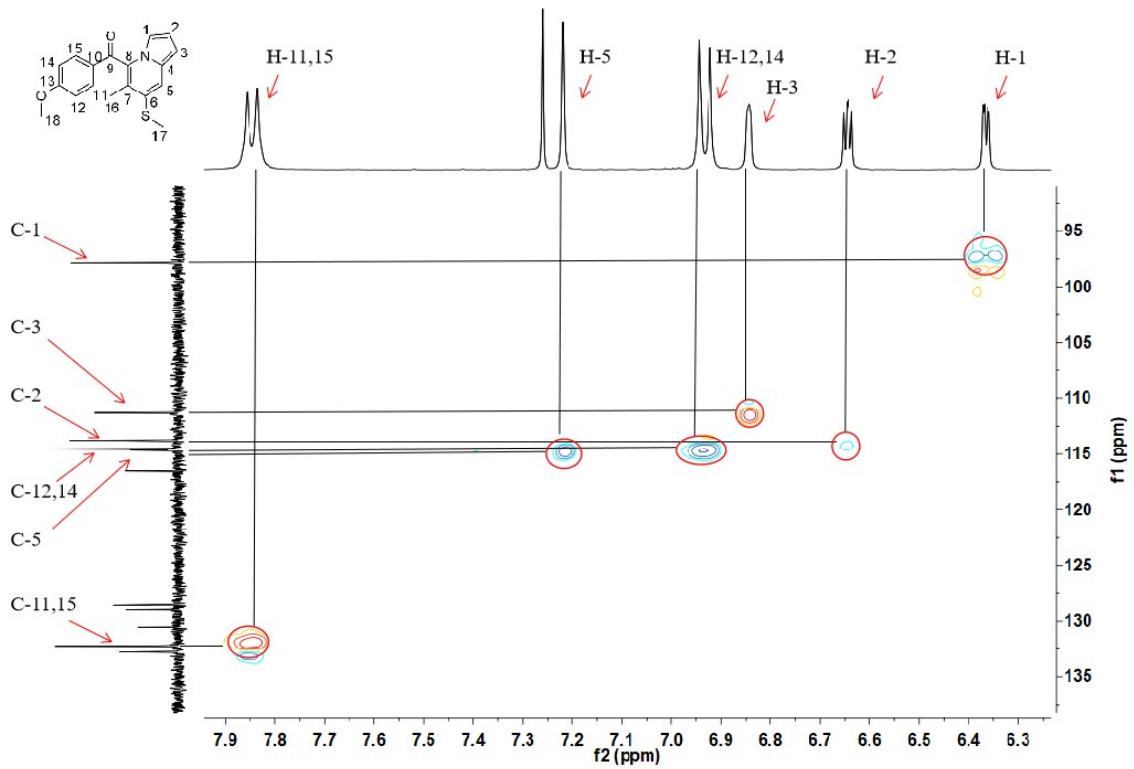

**3g**  $^1\text{H}$ - $^{13}\text{C}$ -HMBC

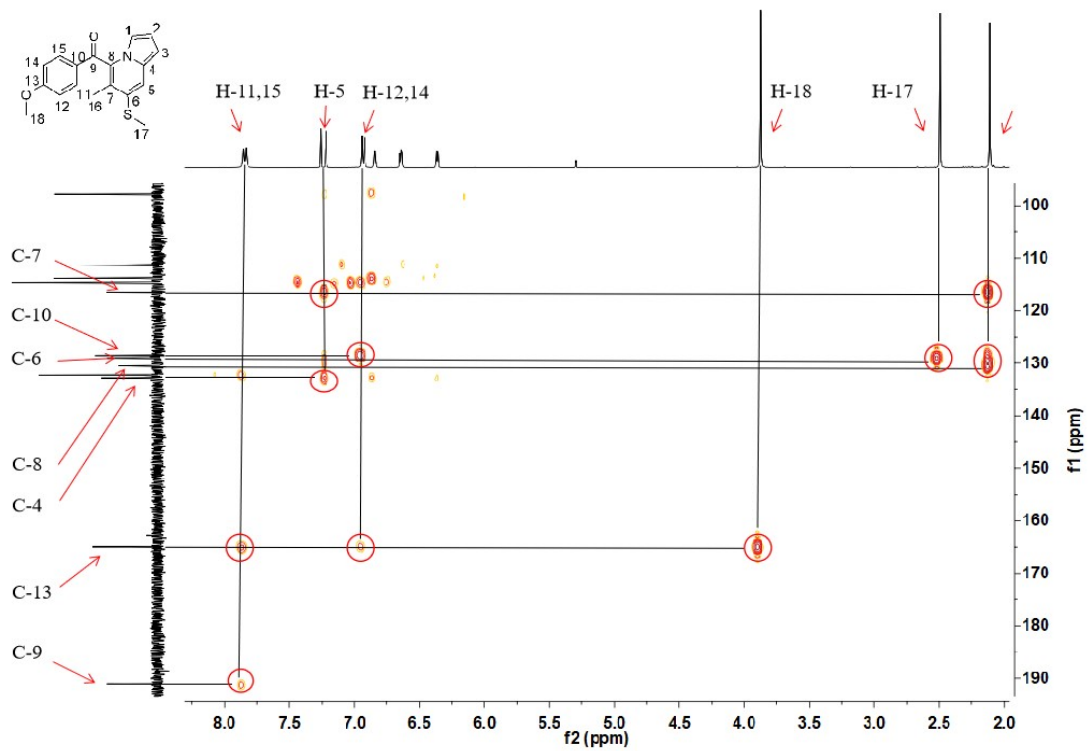

**Characterization data for target compounds 3**

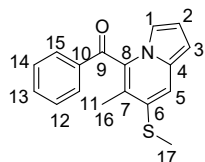

(6-methyl-7-(methylthio)indolizin-5-yl)(phenyl)methanone (**3a**)

Red oil, yield: 188mg, 67%.

$^1\text{H}$  NMR (400MHz,  $\text{CDCl}_3$ ):  $\delta$  7.88 (2H, d,  $J=7.2\text{Hz}$ , H-11,15), 7.64 (1H, t,  $J=7.4\text{Hz}$ , H-13), 7.47 (2H, t,  $J=7.8\text{Hz}$ , H-12,14), 7.24 (1H, s, H-5), 6.84 (1H, s, H-3), 6.65 (1H, t,  $J=3.4\text{Hz}$ , H-2), 6.39 (1H, dd,  $J=4.0, 1.2\text{Hz}$ , H-1), 2.50 (3H, s, H-17), 2.11 (3H, s, H-16);  $^{13}\text{C}$  NMR (100MHz,  $\text{CDCl}_3$ ):  $\delta$  192.9(C-9), 135.8(C-10), 135.0(C-13), 133.0(C-4), 130.4(C-8), 129.9(C-11,15), 129.5(C-12,14), 129.2(C-6), 117.4(C-7), 115.4(C-5), 114.1(C-2), 111.6(C-3), 98.3(C-1), 16.1(C-17), 15.29(C-16); HRMS calcd for  $\text{C}_{17}\text{H}_{15}\text{NOS}+\text{H}^+$ : 282.0947, found: 282.0943.

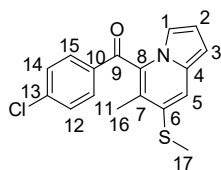

(4-chlorophenyl)(6-methyl-7-(methylthio)indolizin-5-yl)methanone (**3b**)

Red oil, yield: 205mg, 65%.

$^1\text{H}$  NMR (500MHz,  $\text{CDCl}_3$ ):  $\delta$  7.80 (2H, d,  $J=8.5\text{Hz}$ , H-11,15), 7.45 (2H, t,  $J=9.0\text{Hz}$ , H-12,14), 7.23 (1H, s, H-5), 6.80 (1H, m, H-3), 6.66 (1H, dd,  $J=4.0, 2.5\text{Hz}$ , H-2), 6.39 (1H, dd,  $J=4.0, 1.0\text{Hz}$ , H-1), 2.50 (3H, s, H-17), 2.09 (3H, s, H-16);  $^{13}\text{C}$  NMR (125MHz,  $\text{CDCl}_3$ ):  $\delta$  191.6(C-9), 141.7(C-13), 134.2(C-4), 133.1(C-11,15), 131.3(C-8), 130.0(C-6), 129.3(C-10), 117.7(C-7), 115.5(C-5), 114.3(C-12,14), 111.6(C-2), 100.2(C-3), 98.5(C-1), 16.1(C-17), 15.3(C-16); HRMS calcd for  $\text{C}_{17}\text{H}_{14}\text{ClNOS}+\text{H}^+$ : 316.0557, found: 316.0553.

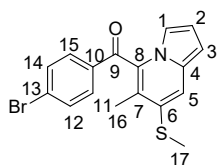

(4-bromophenyl)(6-methyl-7-(methylthio)indolizin-5-yl)methanone (**3c**)

Red oil, yield: 201mg, 56%.

$^1\text{H}$  NMR (500MHz,  $\text{CDCl}_3$ ):  $\delta$  7.73 (2H, d,  $J=8.0\text{Hz}$ , H-11,15), 7.62 (2H, d,  $J=8.0\text{Hz}$ , H-12,14), 7.25 (1H, s, H-5), 6.79 (1H, s, H-3), 6.66 (1H, s, H-2), 6.40 (1H, s, H-1), 2.50 (3H, s, H-17), 2.09 (3H, s, H-16);  $^{13}\text{C}$  NMR (125MHz,  $\text{CDCl}_3$ ):  $\delta$  191.8(C-9), 138.8(C-13), 135.5(C-4), 134.51(C-11,15), 133.0(C-8), 131.3(C-6), 130.6(C-10), 130.0(C-7), 117.8(C-5), 115.5(C-12,14), 114.5(C-2), 111.6(C-3), 98.7(C-1), 16.1(C-17), 15.3(C-16); HRMS calcd for  $\text{C}_{17}\text{H}_{14}\text{BrNOS}+\text{H}^+$ : 360.0052, found: 360.0054.

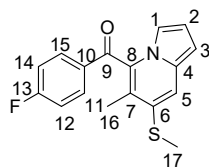

(4-fluorophenyl)(6-methyl-7-(methylthio)indolizin-5-yl)methanone (**3d**)

Yellow oil, yield: 144mg, 48%.

$^1\text{H}$  NMR (400MHz,  $\text{CDCl}_3$ ):  $\delta$  7.90 (2H, dd,  $J=8.8, 5.2\text{Hz}$ , H-11,15), 7.23 (1H, s, H-5), 7.14 (2H, m, H-12,14), 6.81 (1H, s, H-3), 6.66 (1H, dd,  $J=3.6, 2.8\text{Hz}$ , H-2), 6.38 (1H, dd,  $J=3.6, 1.2\text{Hz}$ , H-1), 2.50 (3H, s, H-17), 2.10 (3H, s, H-16).  $^{13}\text{C}$  NMR (100MHz,  $\text{CDCl}_3$ )  $\delta$  191.3(C-9), 167.0 (168.3,165.7, d,  $J=256\text{Hz}$ , C-13), 133.0(C-4), 132.7 (132.8,132.7, d,  $J=10\text{Hz}$ , C-11,15), 132.2 (132.3,132.2, d,  $J=3\text{Hz}$ , C-8), 130.1(C-6), 129.3(C-10), 117.4(C-7), 116.9 (117.0,116.8, d,  $J=22\text{Hz}$ , C-5), 115.3(C-12,14), 114.3(C-2), 111.6(C-3), 98.4(C-1), 16.0(C-17), 15.2(C-16). HRMS calcd for  $\text{C}_{17}\text{H}_{14}\text{FNOS}+\text{H}^+$ : 300.0853, found: 300.0850.

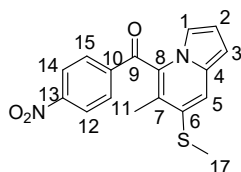

(5-methyl-7-(methylthio)indolizin-5-yl)(4-nitrophenyl)methanone (**3e**)

Red oil, yield: 49mg, 15%.

$^1\text{H}$  NMR (400MHz,  $\text{CDCl}_3$ ):  $\delta$  7.89 (1H, t,  $J=2.0\text{Hz}$ , H-14), 7.67 (1H, d,  $J=8.0\text{Hz}$ , H-12), 7.61 (1H, dd,  $J=8.0, 1.2\text{Hz}$ , H-15), 7.40 (1H, t,  $J=8.0\text{Hz}$ , H-11), 7.25 (1H, s, H-5), 6.82 (1H,

d,  $J=1.2\text{Hz}$ , H-3), 6.66 (1H, dd,  $J=4.0, 2.8\text{Hz}$ , H-2), 6.40 (1H, dd,  $J=3.8, 1.2\text{Hz}$ , H-1), 2.50 (3H, s, H-17), 2.10 (3H, s, H-16);  $^{13}\text{C}$  NMR (100MHz,  $\text{CDCl}_3$ ):  $\delta$  191.4(C-9), 137.3(C-13), 135.7(C-4), 134.7(C-11,15), 132.8(C-8), 130.7(C-6), 129.2(C-10), 127.9(C-7), 117.7(C-5), 115.5(C-12,14), 114.2(C-2), 111.4(C-3), 98.4(C-1), 15.9(C-17), 15.1(C-16); HRMS calcd for  $\text{C}_{17}\text{H}_{14}\text{N}_2\text{O}_3\text{S}+\text{H}^+$ : 327.0798, found: 327.0795.

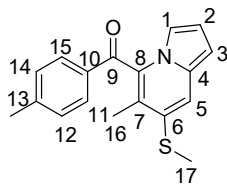

(6-methyl-7-(methylthio)indolizin-5-yl)(p-tolyl)methanone (**3f**)

Red oil, yield: 180mg, 61%.

$^1\text{H}$  NMR (500MHz,  $\text{CDCl}_3$ ):  $\delta$  7.79 (2H, d,  $J=8.0\text{Hz}$ , H-11,15), 7.29 (2H, d,  $J=7.5\text{Hz}$ , H-12,14), 7.25 (1H, s, H-5), 6.86 (1H, s, H-3), 6.67 (1H, t,  $J=3.5\text{Hz}$ , H-2), 6.40 (1H, d,  $J=4.0\text{Hz}$ , H-1), 2.52 (3H, s, H-17), 2.45 (3H, s,  $\text{CH}_3$ -C13), 2.13 (3H, s, H-16);  $^{13}\text{C}$  NMR (125MHz,  $\text{CDCl}_3$ ):  $\delta$  192.5(C-9), 146.3(C-13), 133.3(C-4), 133.0(C-11,15), 130.7(C-8), 130.3(C-6), 130.0(C-10), 129.2(C-7), 117.1(C-5), 115.1(C-12,14), 114.1(C-2), 111.6(C-3), 98.2(C-1), 22.1(C-13), 16.1(C-17), 15.2(C-16); HRMS calcd for  $\text{C}_{18}\text{H}_{17}\text{NOS}+\text{H}^+$ : 296.1104, found: 296.1103.

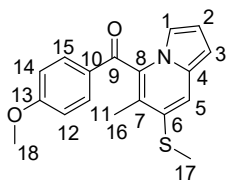

(4-methoxyphenyl)(6-methyl-7-(methylthio)indolizin-5-yl)methanone (**3g**)

Red oil, yield: 121mg, 39%.

$^1\text{H}$  NMR (500MHz,  $\text{CDCl}_3$ ):  $\delta$  7.85 (2H, d,  $J=8.0\text{Hz}$ , H-11,15), 7.21 (1H, s, H-5), 6.93 (2H, d,  $J=8.5\text{Hz}$ , H-12,14), 6.84 (1H, s, H-3), 6.64 (1H, t,  $J=3.5\text{Hz}$ , H-2), 6.36 (1H, d,  $J=3.5\text{Hz}$ , H-1), 3.87 (3H, s, H-18), 2.49 (3H, s, H-17), 2.10 (3H, s, H-16);  $^{13}\text{C}$  NMR (125MHz,  $\text{CDCl}_3$ ):  $\delta$  191.3(C-9), 165.2(C-13), 133.0(C-4), 132.5(C-11,15), 130.8(C-8), 129.3(C-6),

128.8(C-10), 116.8(C-7), 114.9(C-5), 114.8(C-12,14), 114.1(C-2), 111.6(C-3), 98.1(C-1), 55.9(C-18), 16.0(C-17), 15.2(C-16); HRMS calcd for C<sub>18</sub>H<sub>17</sub>NO<sub>2</sub>S+H<sup>+</sup>: 312.1053, found: 312.1050.

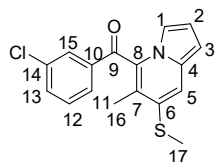

(3-chlorophenyl)(6-methyl-7-(methylthio)indolizin-5-yl)methanone (**3h**)

Red oil, yield: 123mg, 39%.

<sup>1</sup>H NMR (500MHz, DMSO): δ 7.86 (1H, m, H-15), 7.84 (1H, d, *J* = 1.5Hz, H-11), 7.66 (1H, dt, *J* = 8.0, 1.5Hz, H-13), 7.62-7.59 (1H, m, H-12), 7.41 (1H, s, H-5), 6.90-6.89 (1H, m, H-3), 6.67 (1H, dd, *J* = 4.0, 3.0Hz, H-2), 6.42 (1H, dd, *J* = 4.0, 1.5 Hz, H-1), 2.53 (3H, s, H-17), 2.00 (3H, s, H-16); <sup>13</sup>C NMR (125MHz, CDCl<sub>3</sub>): δ 191.4(C-9), 137.3(C-14), 135.7(C-10), 134.7(C-4), 130.7(C-13), 129.5(C-8), 129.2(C-15), 128.7(C-12), 127.9(C-11), 117.7(C-6), 115.5(C-7), 114.2(C-5), 111.4(C-2), 98.4(C-3), 97.4(C-1), 15.9(C-17), 15.1(C-16); HRMS calcd for C<sub>17</sub>H<sub>14</sub>ClNOS+H<sup>+</sup>: 316.0557, found: 316.0554.

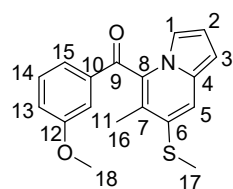

(3-methoxyphenyl)(6-methyl-7-(methylthio)indolizin-5-yl)methanone (**3i**)

Red oil, yield: 215mg, 69%.

<sup>1</sup>H NMR(400M Hz, CDCl<sub>3</sub>): δ 7.52 (1H, d, *J*=1.2Hz, H-15), 7.36-7.32(2H, m, H-11,14), 7.23(1H, s, H-5), 7.19-7.17 (1H, m, H-13), 6.84 (1H, d, *J*=0.8Hz, H-3), 6.65 (1H, dd, *J*=3.6, 2.8Hz, H-2), 6.37 (1H, dd, *J*=4.0, 1.2Hz, H-1), 3.86 (3H, s, H-18), 2.49 (3H, s, H-17), 2.10 (3H, s, H-16); <sup>13</sup>C NMR (100MHz, CDCl<sub>3</sub>): δ 192.8(C-9), 160.6(C-12), 137.2(C-10), 133.1(C-4), 130.6(C-8), 129.2(C-14), 123.0(C-15), 121.8(C-13), 117.4(C-11), 115.4(C-6), 114.2(C-7), 113.2(C-5), 111.7(C-2), 100.2(C-3), 98.3(C-1), 55.8(C-18), 16.1(C-17), 15.27(C-16); HRMS calcd for C<sub>18</sub>H<sub>17</sub>NO<sub>2</sub>S+H<sup>+</sup>: 312.1053, found: 312.1055.

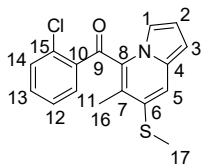

(2-chlorophenyl)(6-methyl-7-(methylthio)indolizin-5-yl)methanone (**3j**)

Red oil, yield: 224mg, 71%.

$^1\text{H}$  NMR (500MHz,  $\text{CDCl}_3$ ):  $\delta$  7.63 (1H, d,  $J=10.0\text{Hz}$ , H-11), 7.51-7.46 (2H, m, H-14), 7.35-7.31 (1H, m, H-13), 7.28 (1H, s, H-5), 7.07 (1H, d,  $J=1.5\text{Hz}$ , H-3), 6.68 (1H, dd,  $J=4.0, 3.5\text{Hz}$ , H-2), 6.40 (1H, dd,  $J=4.5, 1.0\text{Hz}$ , H-1), 2.48 (3H, s, H-17), 2.13 (3H, s, H-16);  $^{13}\text{C}$  NMR(125MHz,  $\text{CDCl}_3$ ):  $\delta$  191.3(C-9), 136.6(C-15), 134.0(C-8), 133.9(C-13), 133.2(C-4), 131.9(C-10), 131.8(C-14), 131.1(C-11), 129.1(C-12), 127.7(C-6), 120.0(C-7), 116.8(C-5), 114.3(C-2), 112.2(C-3), 98.8(C-1), 16.2(C-17), 15.3(C-16); HRMS calcd for  $\text{C}_{17}\text{H}_{14}\text{ClNOS}+\text{H}^+$ : 316.0557, found: 316.0555.

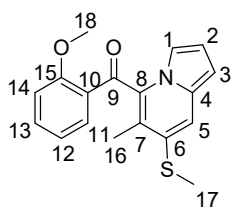

(2-methoxyphenyl)(6-methyl-7-(methylthio)indolizin-5-yl)methanone (**3k**)

Red oil, yield: 149mg, 48%.

$^1\text{H}$  NMR (400MHz,  $\text{CDCl}_3$ ):  $\delta$  7.80 (1H, dd,  $J=8.0, 1.6\text{Hz}$ , H-11), 7.55 (1H, t,  $J=7.0\text{Hz}$ , H-13), 7.20 (1H, s, H-5), 7.03 (1H, t,  $J=7.6\text{Hz}$ , H-12), 6.95 (1H, d,  $J=8.4\text{Hz}$ , H-14), 6.91 (1H, d,  $J=1.2\text{Hz}$ , H-3), 6.62 (1H, dd,  $J=4.0, 2.8\text{Hz}$ , H-2), 6.34 (1H, dd,  $J=3.6, 1.2\text{Hz}$ , H-1), 3.58 (3H, s, H-18), 2.47 (3H, s, H-17), 2.13 (3H, s, H-16);  $^{13}\text{C}$  NMR (100MHz,  $\text{CDCl}_3$ ):  $\delta$  191.1(C-9), 160.5(C-15), 135.8(C-13), 133.4(C-4), 133.0(C-8), 132.2(C-11), 129.3(C-12), 126.5(C-14), 121.3(C-10), 116.7(C-6), 115.3(C-7), 113.7(C-5), 112.7(C-2), 111.4(C-3), 98.0(C-1), 56.3(C-18), 16.3(C-17), 15.0(C-16); HRMS calcd for  $\text{C}_{18}\text{H}_{17}\text{NO}_2\text{S}+\text{H}^+$ : 312.1053, found: 312.1055.

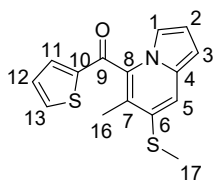

(6-methyl-7-(methylthio)indolizin-5-yl)(thiophen-2-yl)methanone (**3l**)

Red oil, yield: 118mg, 41%.

$^1\text{H}$  NMR (500MHz,  $\text{CDCl}_3$ ):  $\delta$  7.81 (1H, dd,  $J=5.0, 1.0\text{Hz}$ , H-13), 7.50 (1H, dd,  $J=3.5, 0.5\text{Hz}$ , H-11), 7.22 (1H, s, H-5), 7.11-7.09 (1H, m, H-12), 7.01 (1H, m, H-3), 6.70 (1H, dd,  $J=3.5, 2.5\text{Hz}$ , H-2), 6.40 (1H, dd,  $J=4.0, 1.5\text{Hz}$ , H-1), 2.52(3H, s, H-17), 2.20 (3H, s, H-16);  $^{13}\text{C}$  NMR (125MHz,  $\text{CDCl}_3$ ):  $\delta$  184.6(C-9), 143.1(C-10), 136.8(C-4), 135.7(C-13), 132.9(C-11), 130.2(C-8), 128.9(C-12), 128.9(C-6), 117.0(C-7), 115.3(C-5), 113.9(C-2), 111.4(C-3), 98.2(C-1), 15.9(C-17), 15.3(C-16); HRMS calcd for  $\text{C}_{15}\text{H}_{13}\text{NOS}_2+\text{H}^+$ : 288.0511, found: 288.0512.

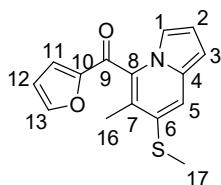

furan-2-yl(6-methyl-7-(methylthio)indolizin-5-yl)methanone (**3m**)

Red oil, yield: 133mg, 49%.

$^1\text{H}$  NMR (400MHz,  $\text{CDCl}_3$ ):  $\delta$  7.71 (s, 1H, H-13), 7.22 (s, 1H, H-5), 7.16 (d,  $J=3.6\text{Hz}$ , 1H, H-11), 7.00 (s, 1H, H-3), 6.70–6.67 (m, 1H, H-12), 6.57 (dd,  $J=3.6, 2.0\text{Hz}$ , 1H, H-2), 6.38 (dd,  $J=3.6, 0.8\text{Hz}$ , 1H, H-1), 2.48 (s, 3H, H-17), 2.16 (s, 3H, H-16);  $^{13}\text{C}$  NMR (100MHz,  $\text{CDCl}_3$ ):  $\delta$  179.2(C-9), 152.1(C-10), 148.8(C-4), 132.8(C-13), 129.5(C-8), 128.9(C-11), 121.9(C-12), 117.9(C-6), 115.7(C-7), 113.9(C-5), 113.1(C-2), 111.3(C-3), 98.3(C-1), 15.9(C-17), 15.2(C-16); HRMS calcd for  $\text{C}_{15}\text{H}_{13}\text{NO}_2\text{S}+\text{H}^+$ : 272.0740, found: 272.0735.

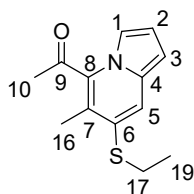

1-(6-methyl-7-(methylthio)indolizin-5-yl)ethenone (**3p**)

Yellow oil, yield: 72mg, 33%.

$^1\text{H}$  NMR (500MHz,  $\text{CDCl}_3$ ):  $\delta$  7.18 (1H, s, H-5), 7.04 (1H, m, H-3), 6.75 (1H, dd,  $J=3.5\text{Hz}$ , 2.5Hz, H-2), 6.39 (1H, dd,  $J=3.5$ , 1.0Hz, H-1), 2.63 (3H, s, H-COCH<sub>3</sub>), 2.46 (3H, s, H-17), 2.23 (3H, s, H-16);  $^{13}\text{C}$  NMR (125MHz,  $\text{CDCl}_3$ ):  $\delta$  199.5(C-9), 132.9(C-4), 132.5(C-8), 129.1(C-6), 116.0(C-7), 115.4(C-5), 114.3(C-2), 110.7(C-3), 98.5(C-1), 30.6(C-10), 16.0(C-17), 14.7(C-16); HRMS calcd for  $\text{C}_{12}\text{H}_{13}\text{NOS}+\text{H}^+$ : 220.0791, found: 220.0794.

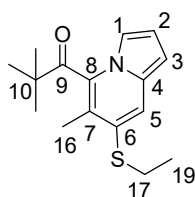

2, 2-dimethyl-1-(6-methyl-7-(methylthio)indolizin-5-yl)propan-1-one (**3q**)

Yellow oil, yield: 76mg, 29%.

$^1\text{H}$  NMR (500MHz,  $\text{CDCl}_3$ ):  $\delta$  7.10 (1H, s, H-5), 6.80 (1H, m, H-3), 6.71 (1H, dd,  $J=4.0$ , 3.0Hz, H-2), 6.35 (1H, dd,  $J=3.5$ , 1.0Hz, H-1), 2.46 (3H, s, H-17), 2.13 (3H, s, H-16), 1.29 (9H, s, H-C<sub>3</sub>H<sub>9</sub>);  $^{13}\text{C}$  NMR (125MHz,  $\text{CDCl}_3$ ):  $\delta$  211.0(C-9), 132.9(C-4), 132.4(C-8), 129.4(C-6), 114.2(C-7), 114.1(C-5), 113.9(C-2), 111.1(C-3), 98.2(C-1), 46.0(C-10), 27.8(C-C<sub>3</sub>H<sub>9</sub>), 15.9(C-17), 15.8(C-16); HRMS calcd for  $\text{C}_{15}\text{H}_{19}\text{NOS}+\text{H}^+$ : 262.1260, found: 262.1265.

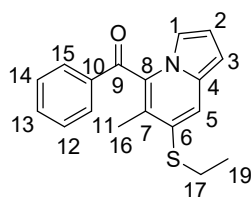

(7-(ethylthio)-6-methylindolizin-5-yl)(phenyl)methanone (**3r/3s**)

Red oil, yield: 150mg, 51%/127mg, 43%.

$^1\text{H}$  NMR (500MHz,  $\text{CDCl}_3$ ):  $\delta$  7.87 (2H, d,  $J=7.0\text{Hz}$ , H-11,15), 7.64 (1H, t,  $J=7.5\text{Hz}$ , H-13), 7.48 (2H, t,  $J=7.5\text{Hz}$ , H-12,14), 7.44 (1H, s, H-5), 6.86 (1H, s, H-3), 6.66 (1H, s, H-2), 6.42 (1H, s, H-1), 2.92 (2H, q,  $J=7.0\text{Hz}$ , H-17), 2.13 (3H, s, H-16), 1.38 (3H, t,  $J=7.5\text{Hz}$ , H-19);  $^{13}\text{C}$  NMR (125MHz,  $\text{CDCl}_3$ ):  $\delta$  192.7(C-9), 135.6(C-13), 134.8(C-4), 132.6(C-11,15), 130.3(C-8), 129.7(C-6), 129.3(C-10), 126.6(C-7), 119.3(C-5), 118.4(C-12,14), 114.1(C-2),



111.8(C-3), 98.7(C-1), 27.8(C-19), 15.5(C-17), 13.9(C-16); HRMS calcd for  $C_{18}H_{17}NOS+H^+$ : 296.1104, found: 296.1101.

Procedure for the synthesis of derived compound (6-methyl-7-(methylsulfinyl)indolizin-5-yl)(phenyl)methanone (**4**)

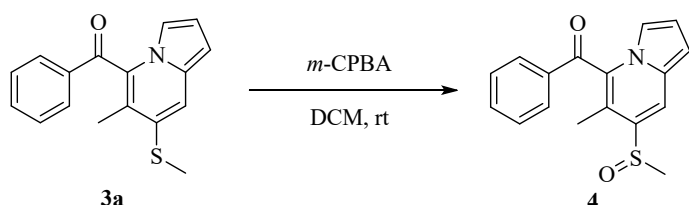

To a solution of **3a** (0.2 mmol, 50 mg) in 10 mL of dichloromethane, *m*-CPBA (0.8 mmol, 136mg) was added in portions (0.2 mmol each time) at 0° C, and then the reaction was stirred at room temperature for 2 h. After completion, the reaction solution was concentrated under reduced pressure to obtain a crude residue, which was purified by silica gel column chromatography (petroleum ether: dichloromethane=1:2) to obtain product **4**.

Yellow solid, yield: 38mg, 72%.

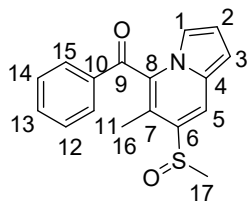

$^1\text{H}$  NMR (400 MHz,  $\text{CDCl}_3$ )  $\delta$  8.17 (1H, s, H-5), 7.85 (2H, d,  $J = 7.3$  Hz), 7.67 (1H, t,  $J = 7.4$  Hz, H-11,15), 7.50 (2H, t,  $J = 7.8$  Hz, H-12,14), 7.01 (1H, s, H-3), 6.80 – 6.78 (1H, m, H-2), 6.73 (1H, d,  $J = 3.2$  Hz, H-1), 2.78 (3H, s, H-17), 2.11 (3H, s, H-16);  $^{13}\text{C}$  NMR (100 MHz,  $\text{CDCl}_3$ )  $\delta$  191.0(C-9), 134.1(C-13), 133.1(C-4), 130.8(C-11,15), 129.7(C-8), 128.7(C-6), 128.5(C-10), 128.5(C-7), 116.0(C-5), 114.4(C-12,14), 112.9(C-2), 112.3(C-3), 102.2(C-1), 42.0(C-17), 12.6(C-16); HRMS calcd for  $C_{17}H_{15}NO_2S+H^+$ : 298.0896, found: 298.0899.

# <sup>1</sup>H and <sup>13</sup>C NMR Spectra of target compounds 3

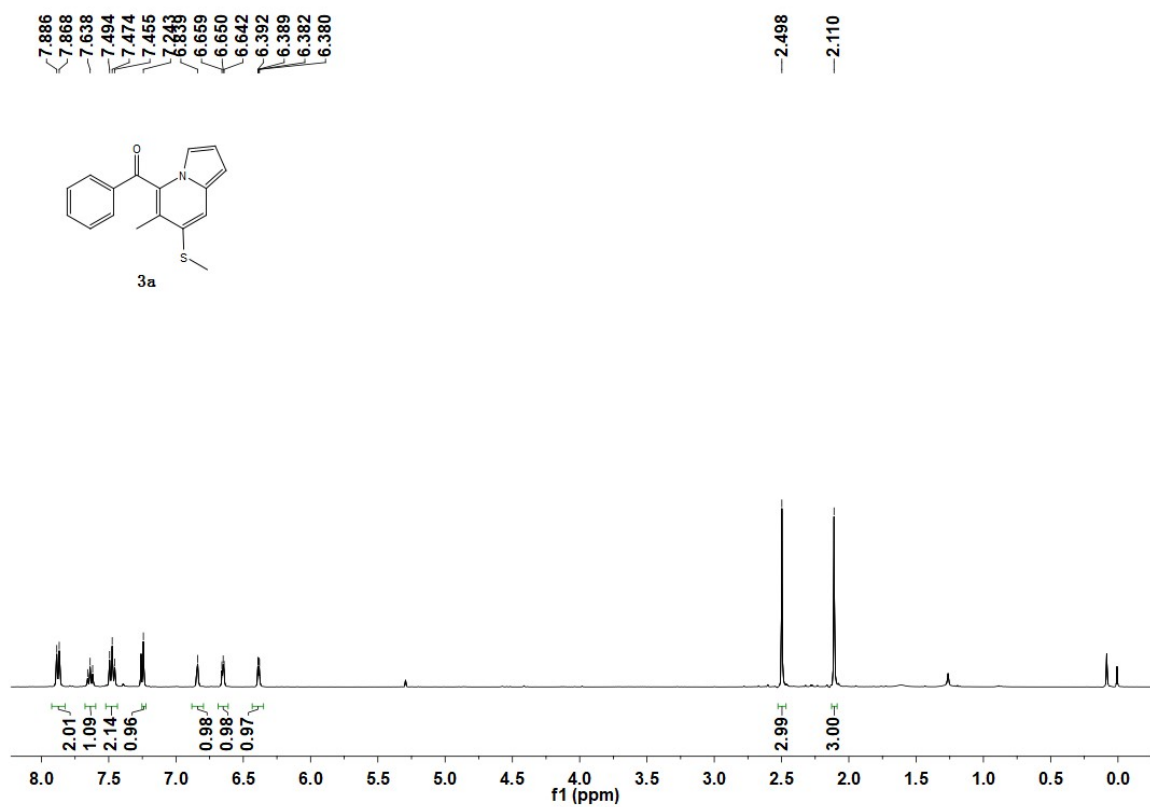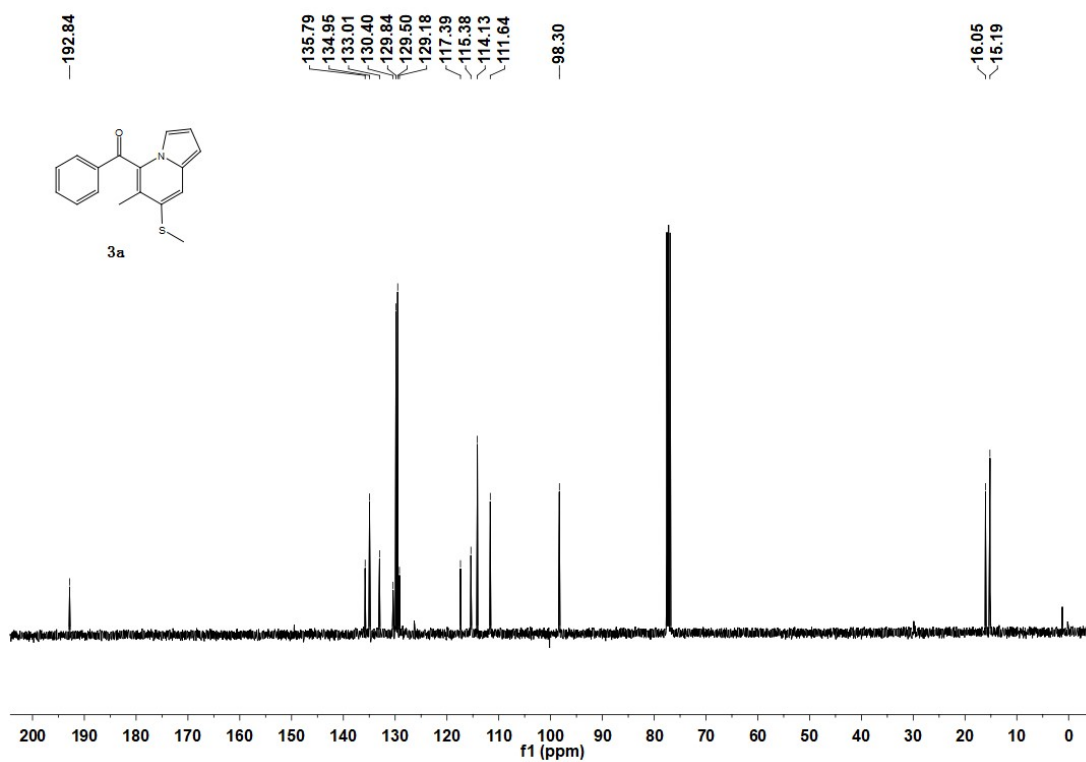

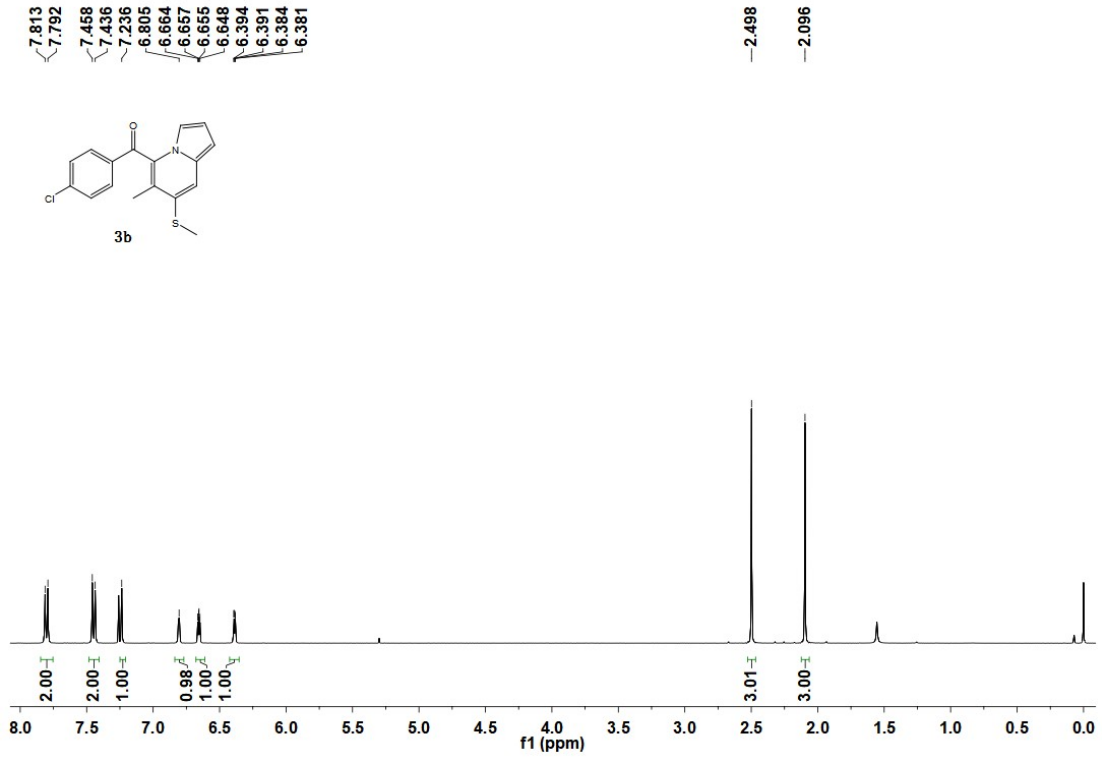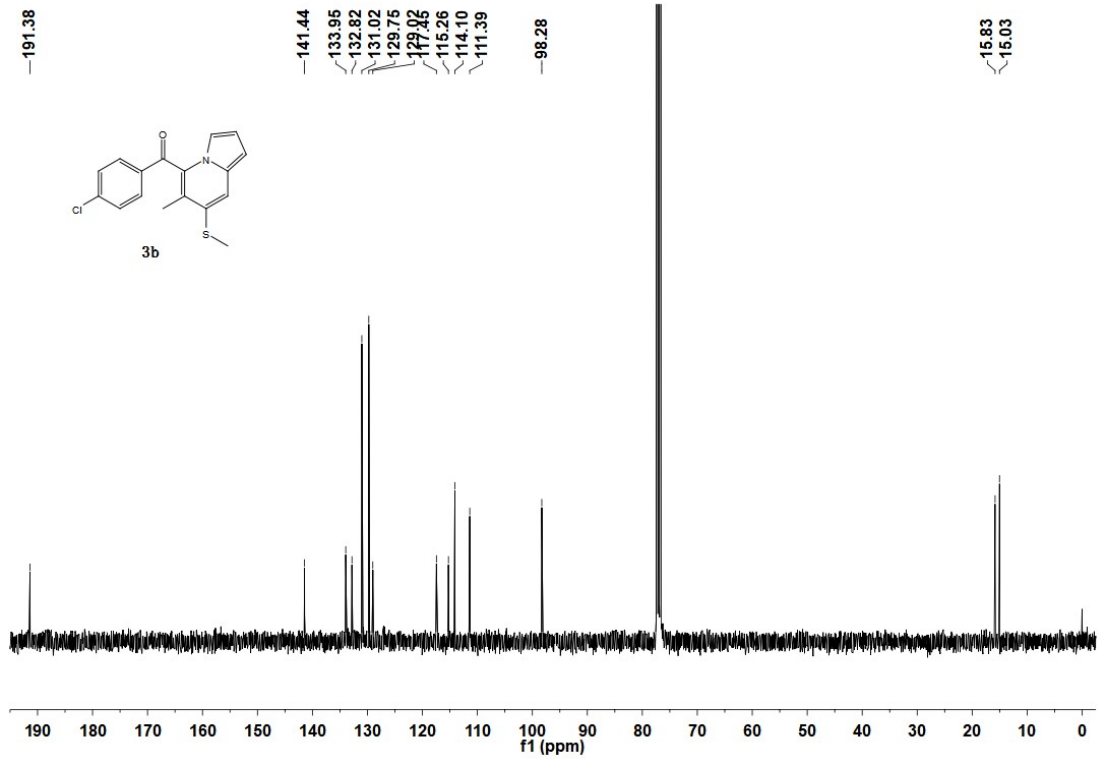

7.735  
7.719  
7.627  
7.611  
7.260  
6.791  
6.664  
6.402

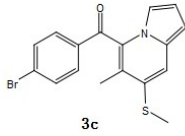

2.503  
2.095

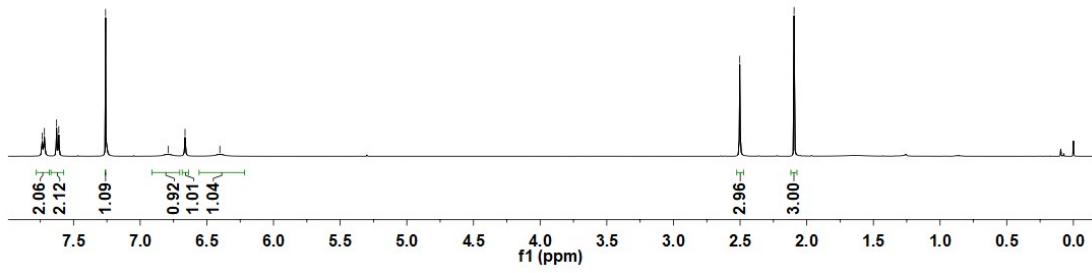

191.78

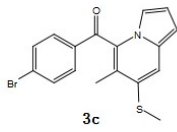

138.80  
135.54  
134.54  
132.99  
131.33  
130.58  
129.99  
117.83  
115.50  
114.49  
111.56

98.69

15.07  
15.28

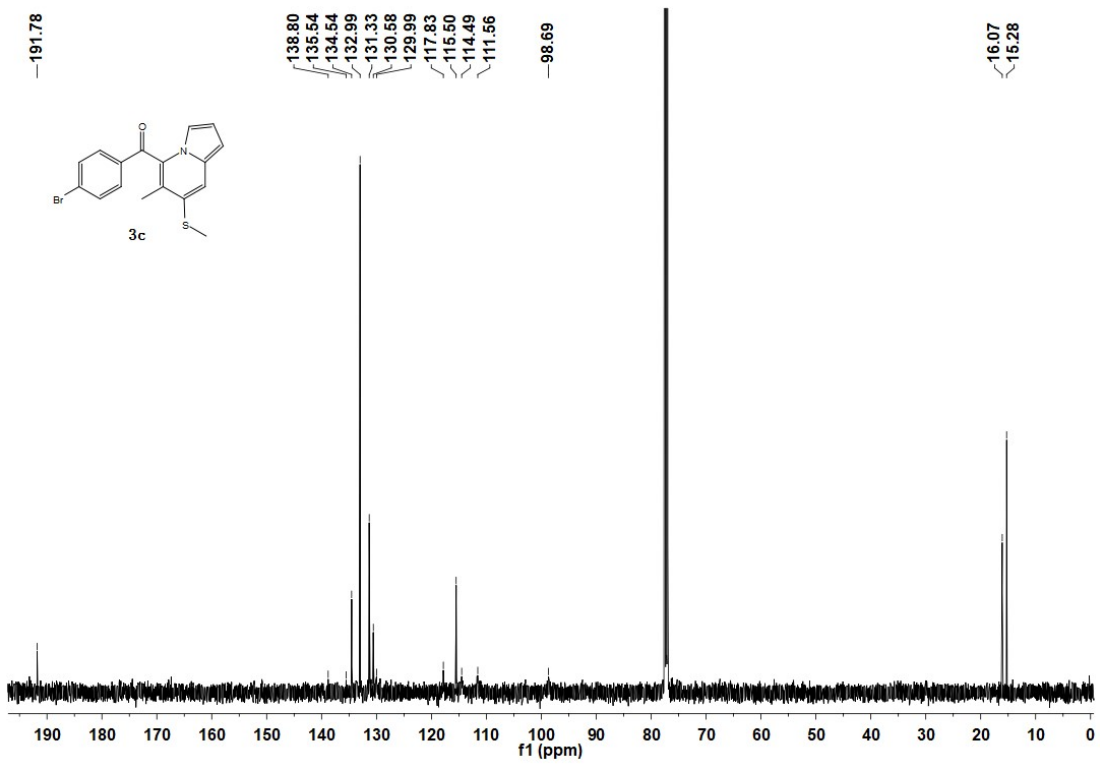

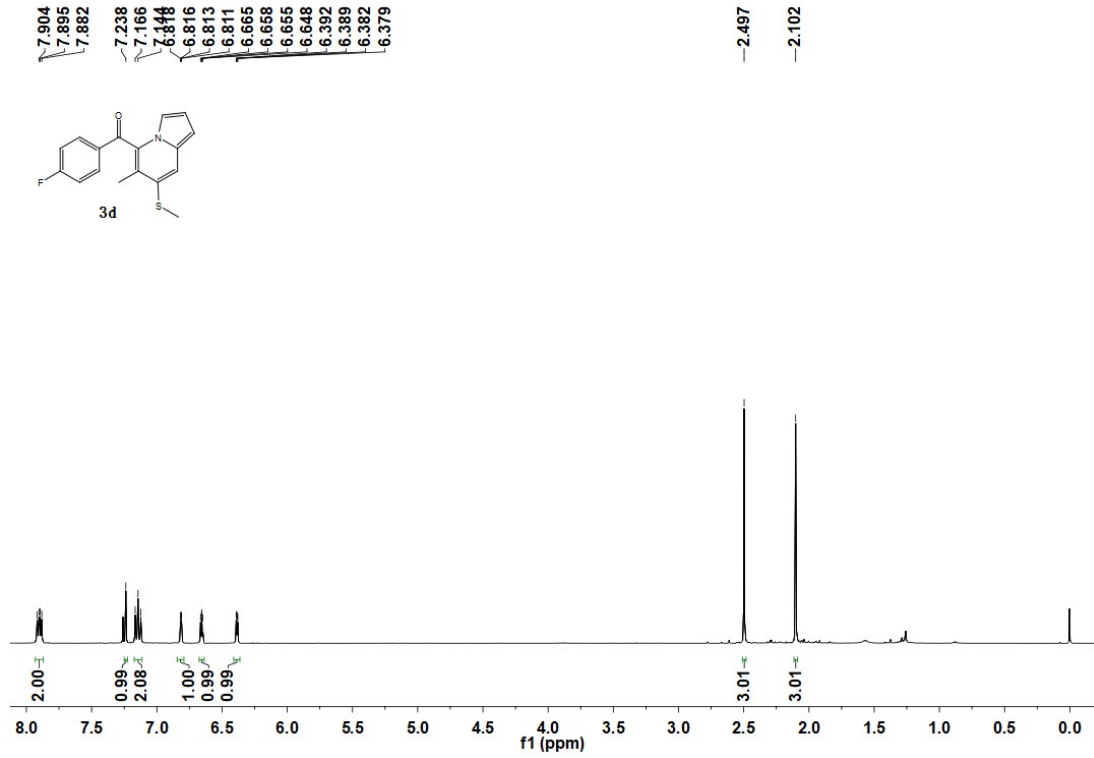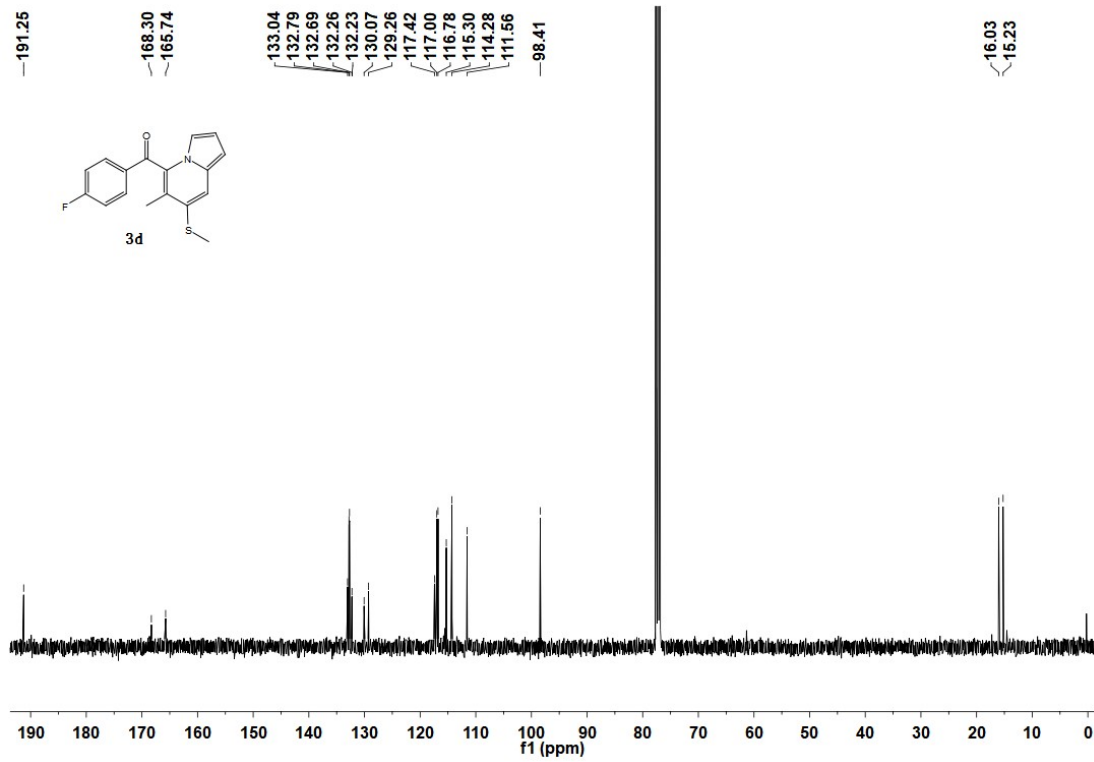

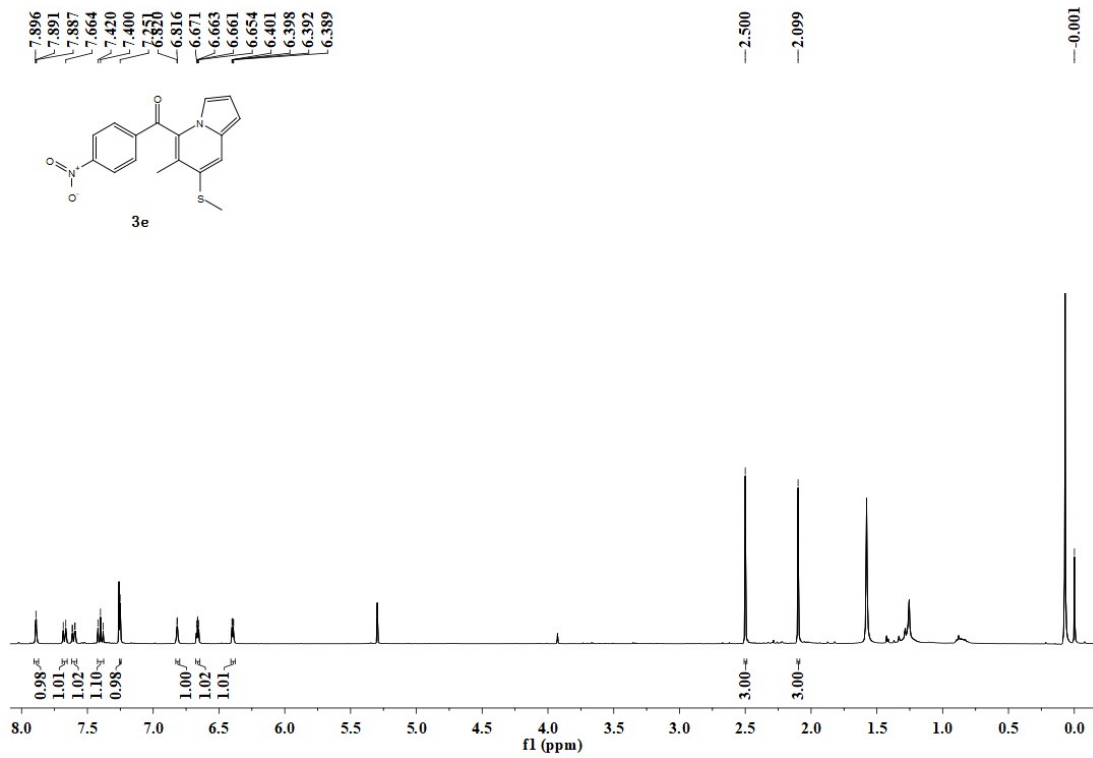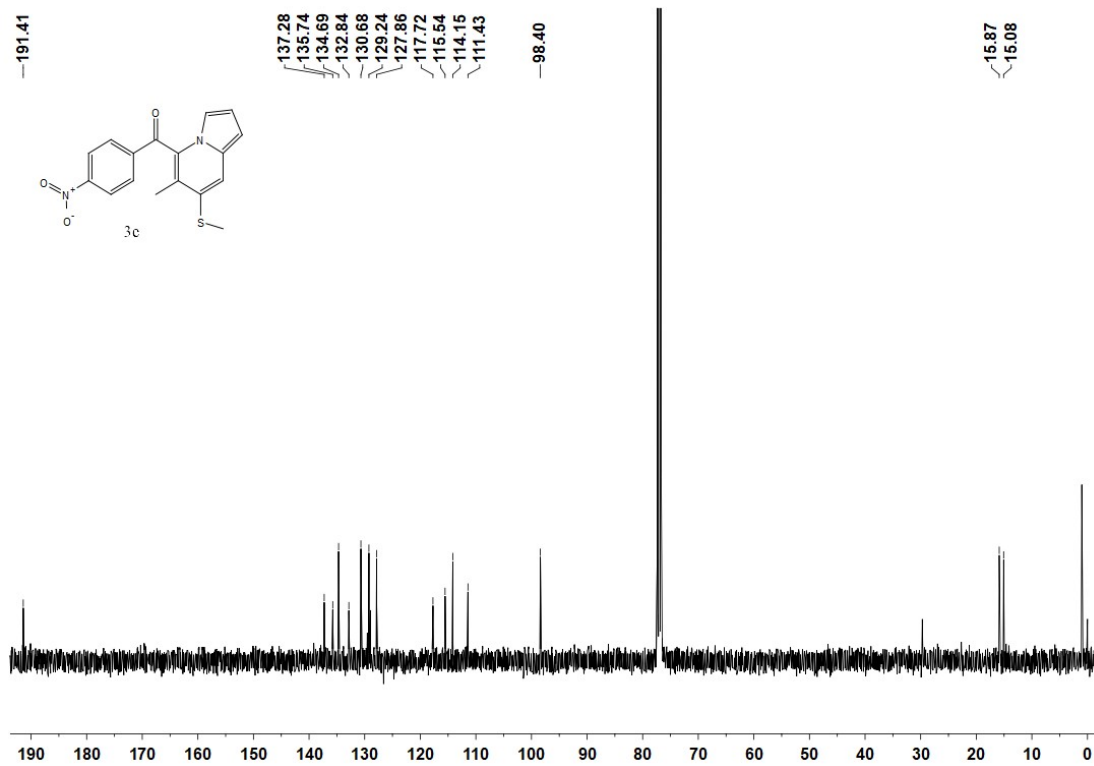

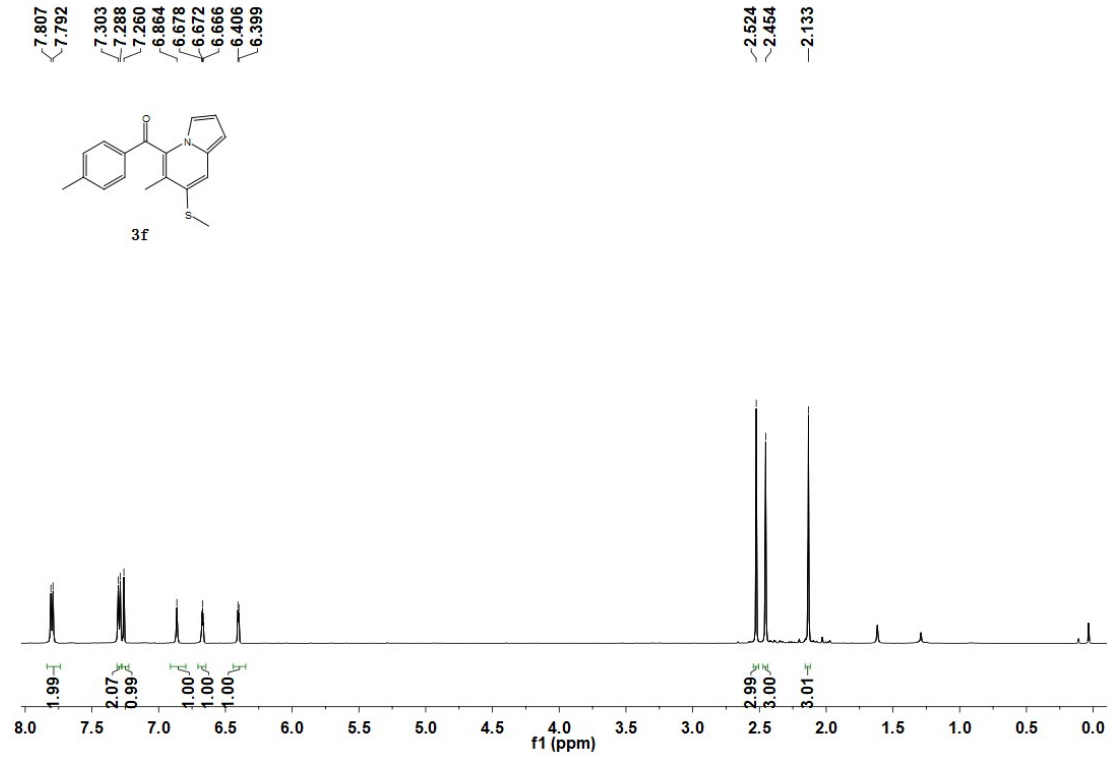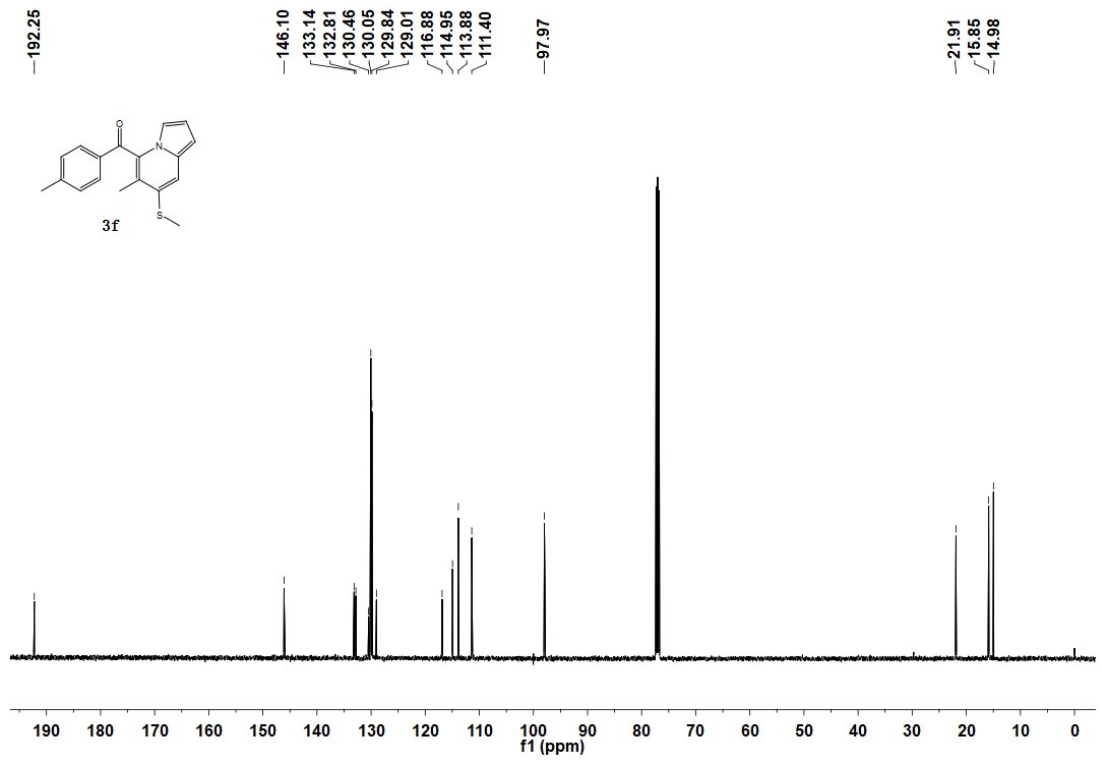

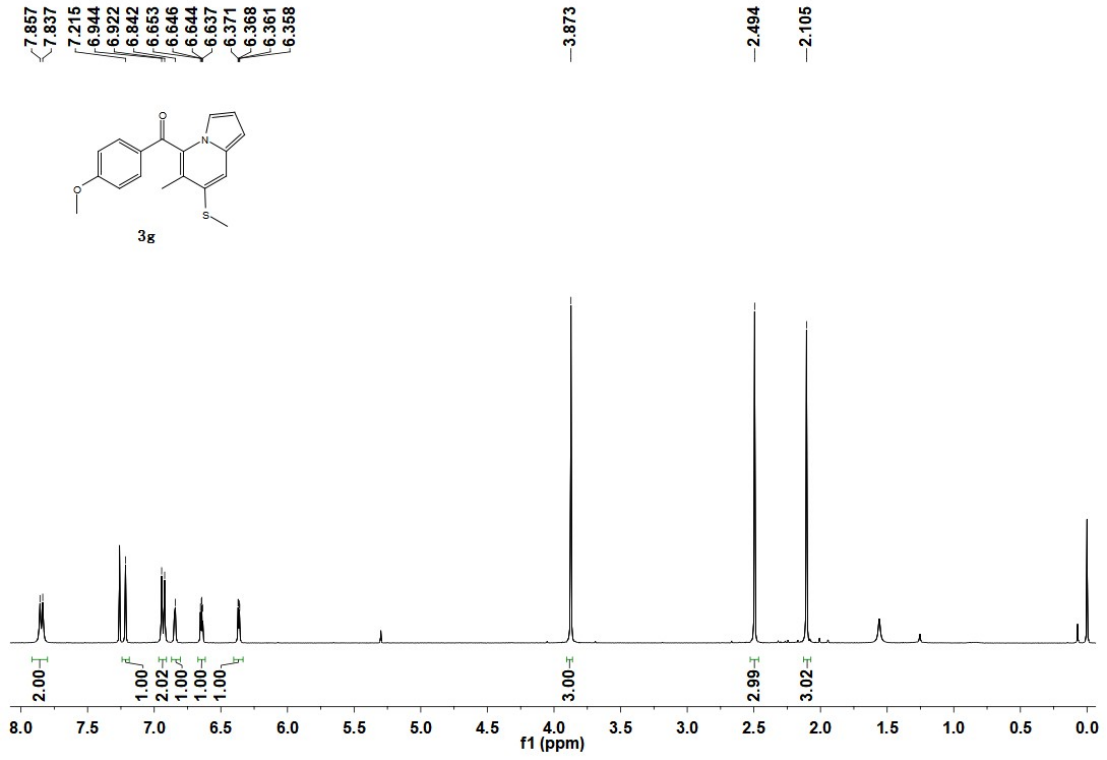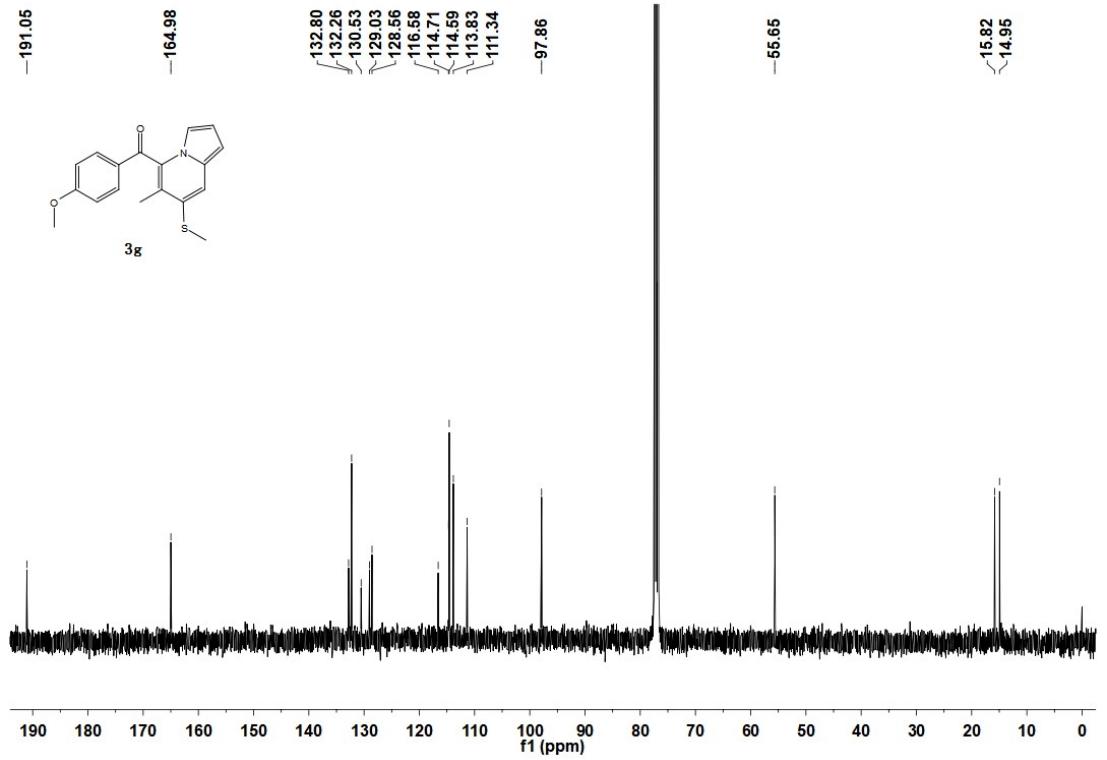



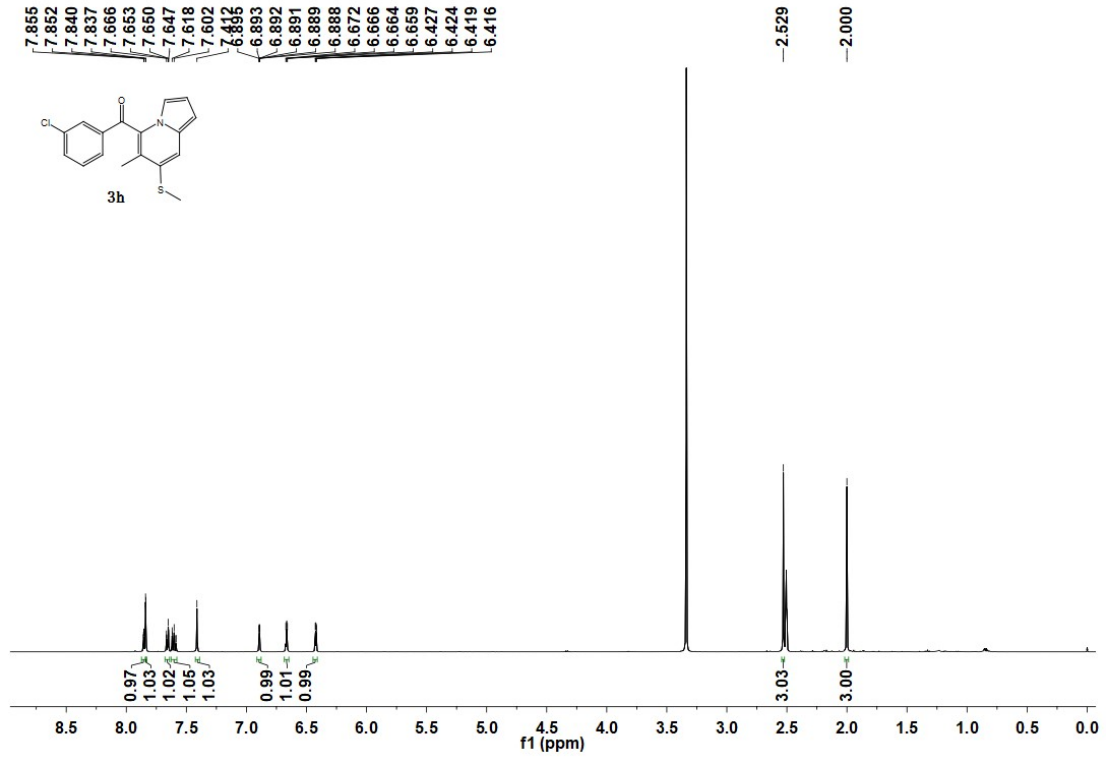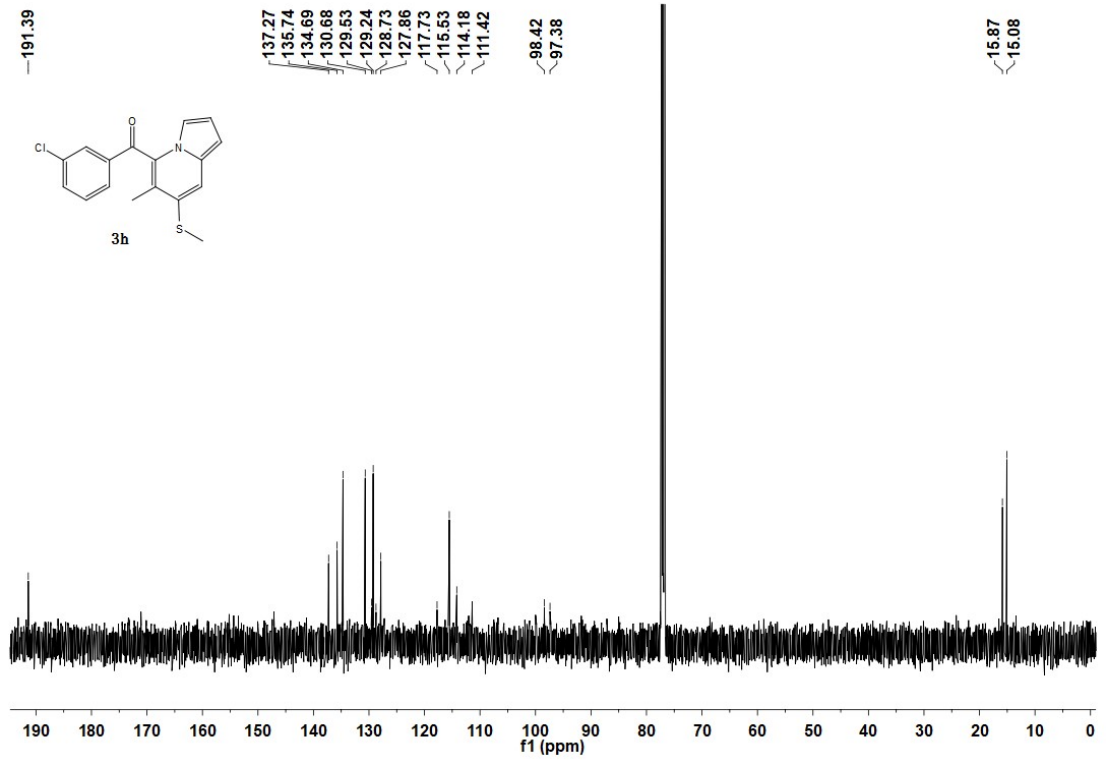

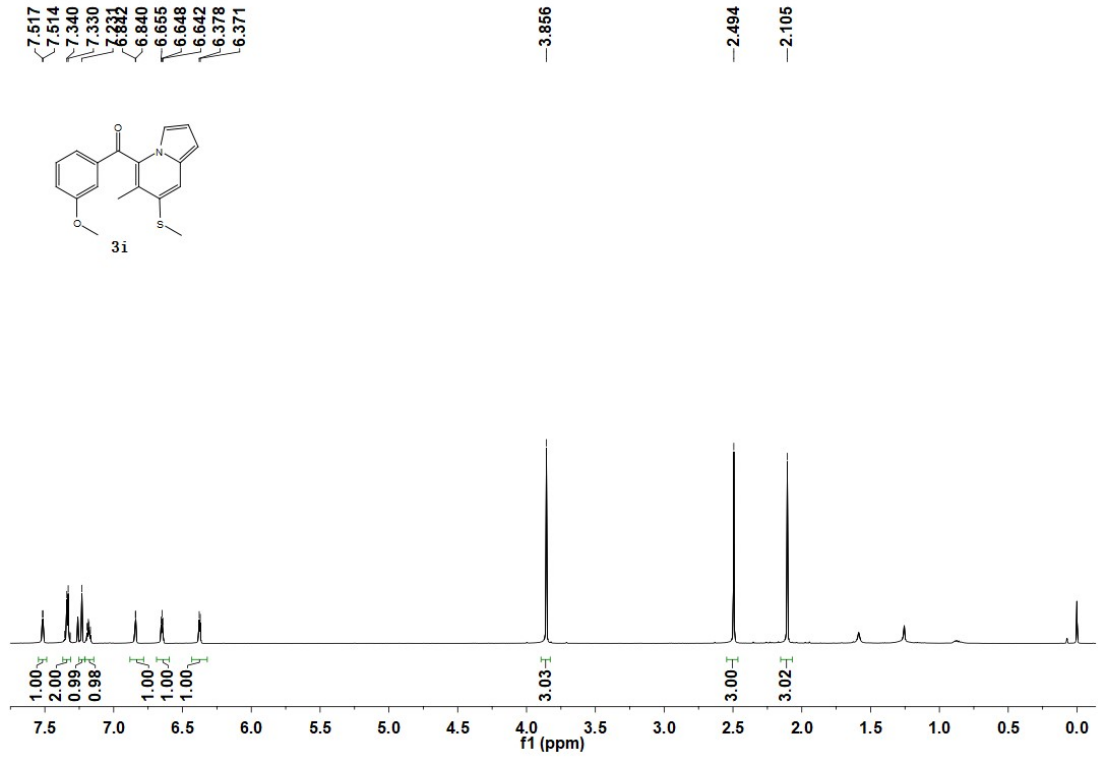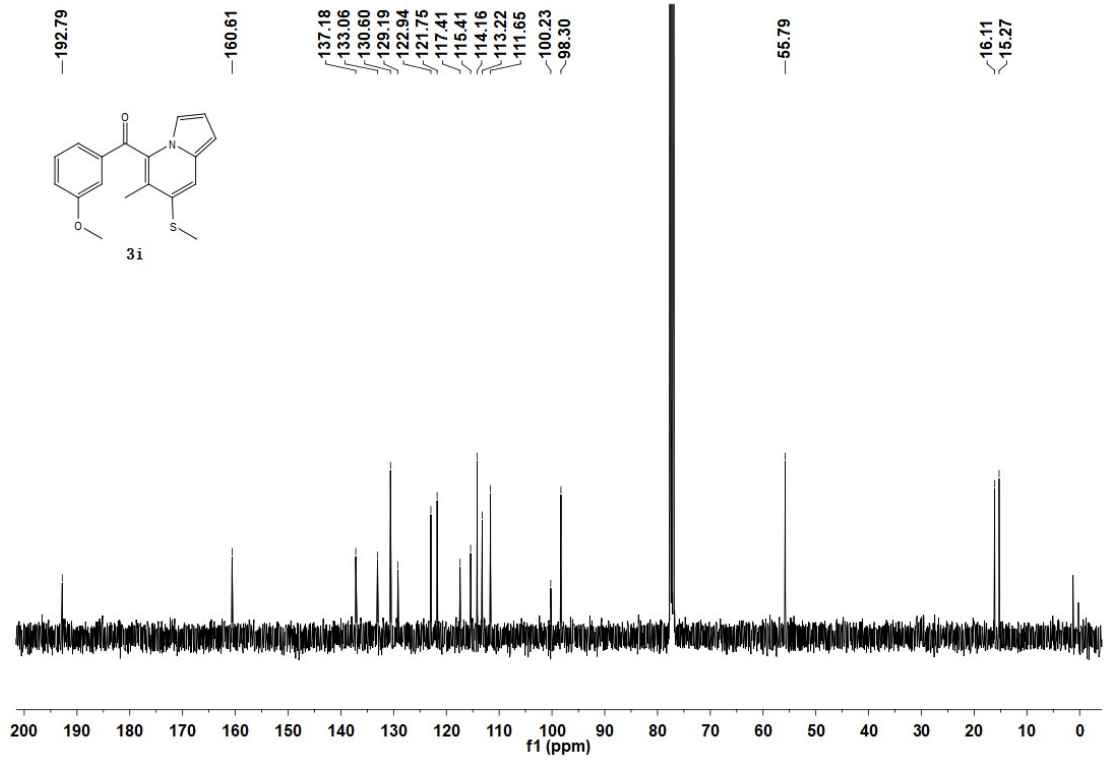

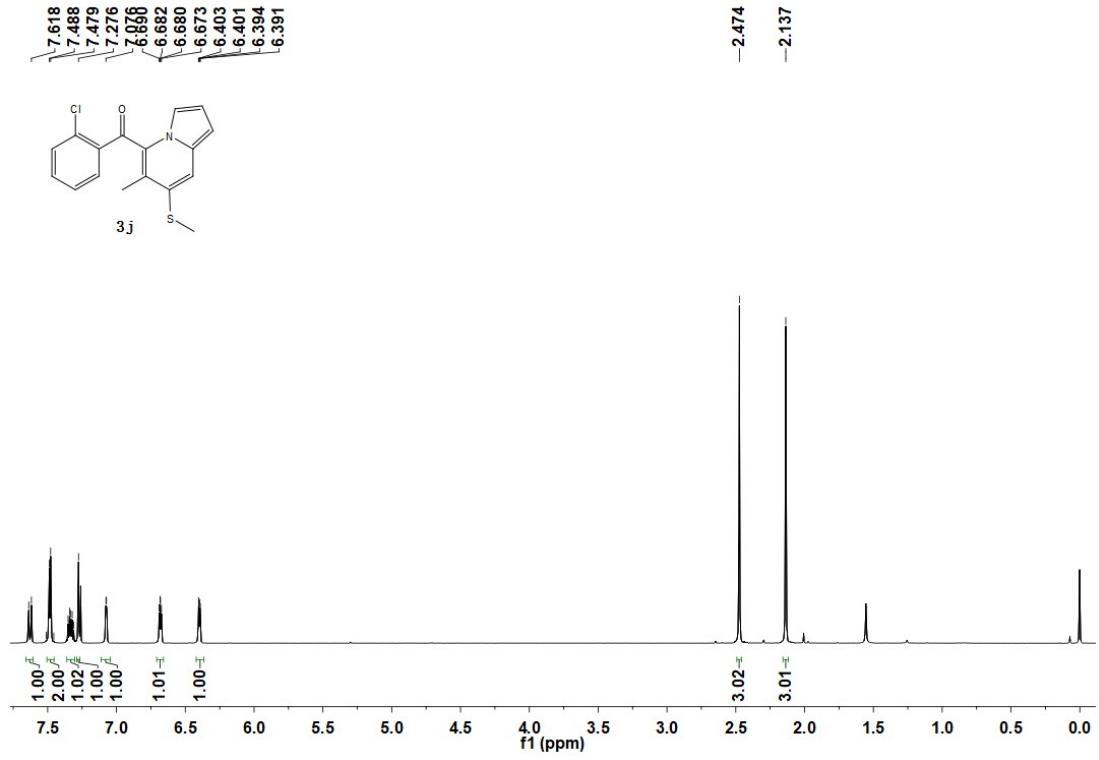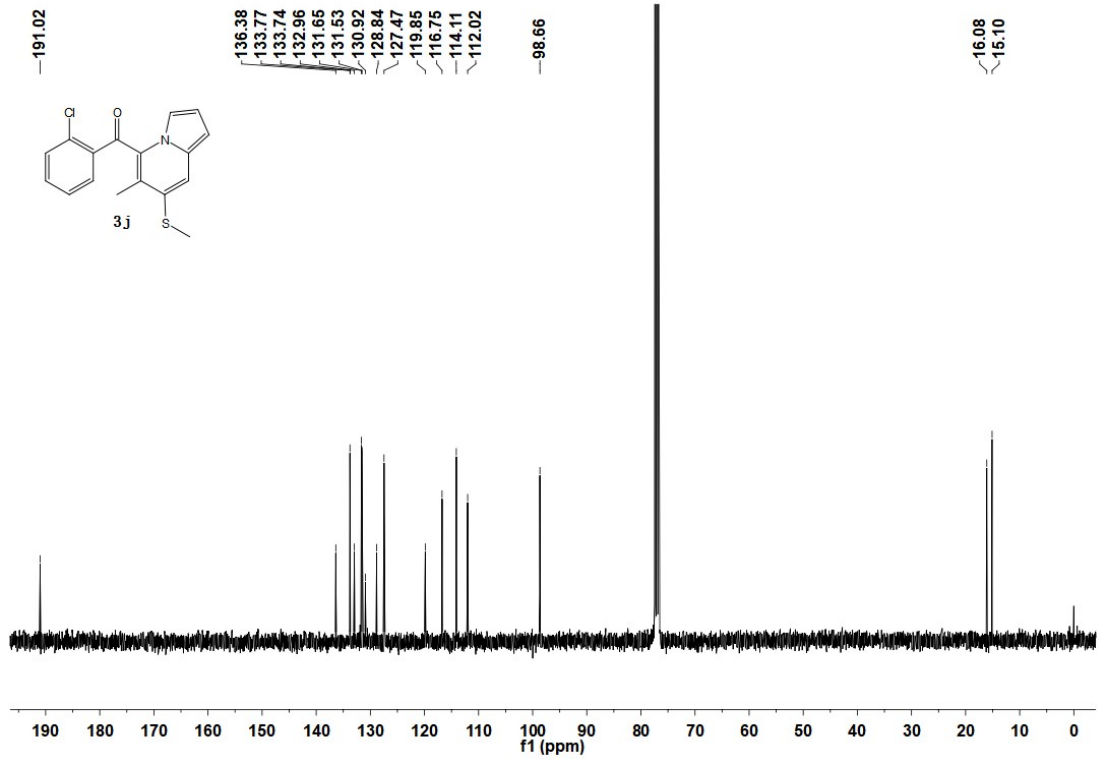

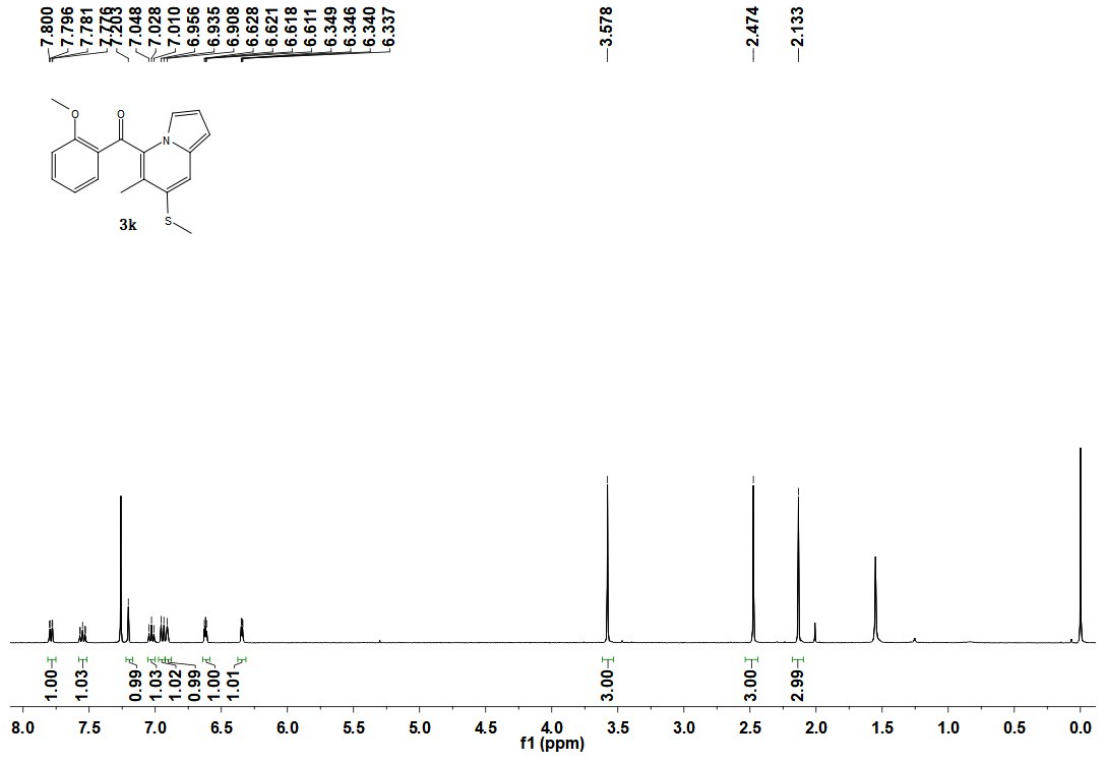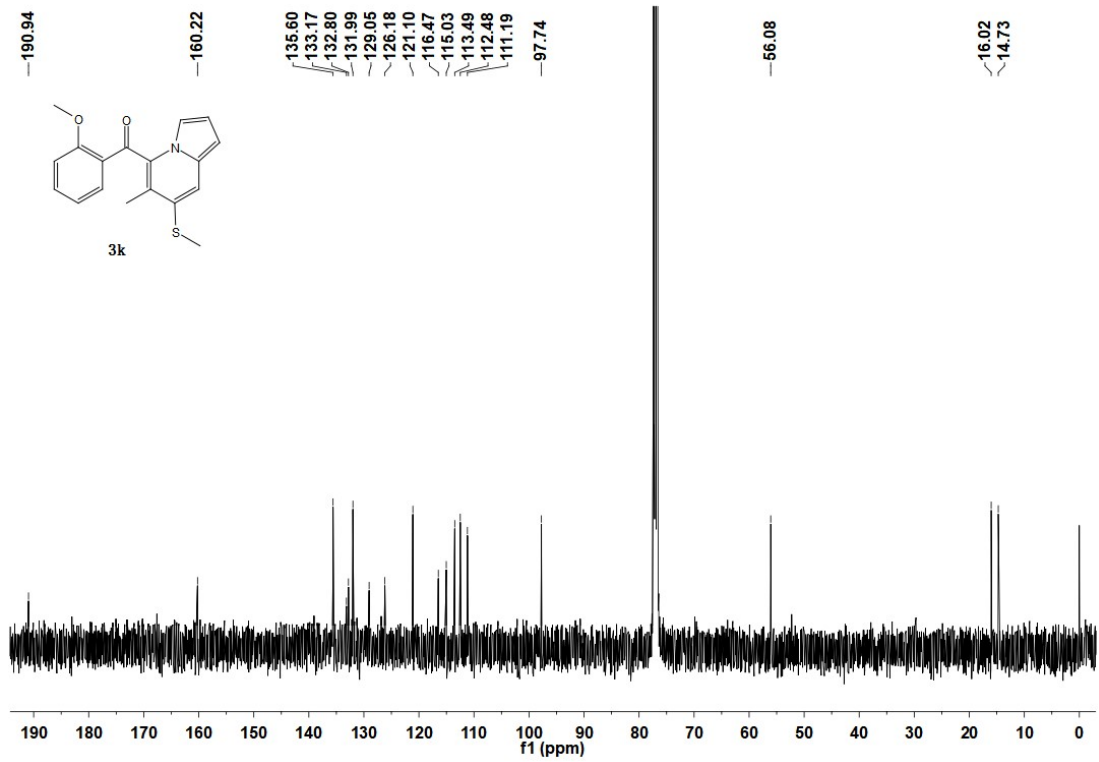

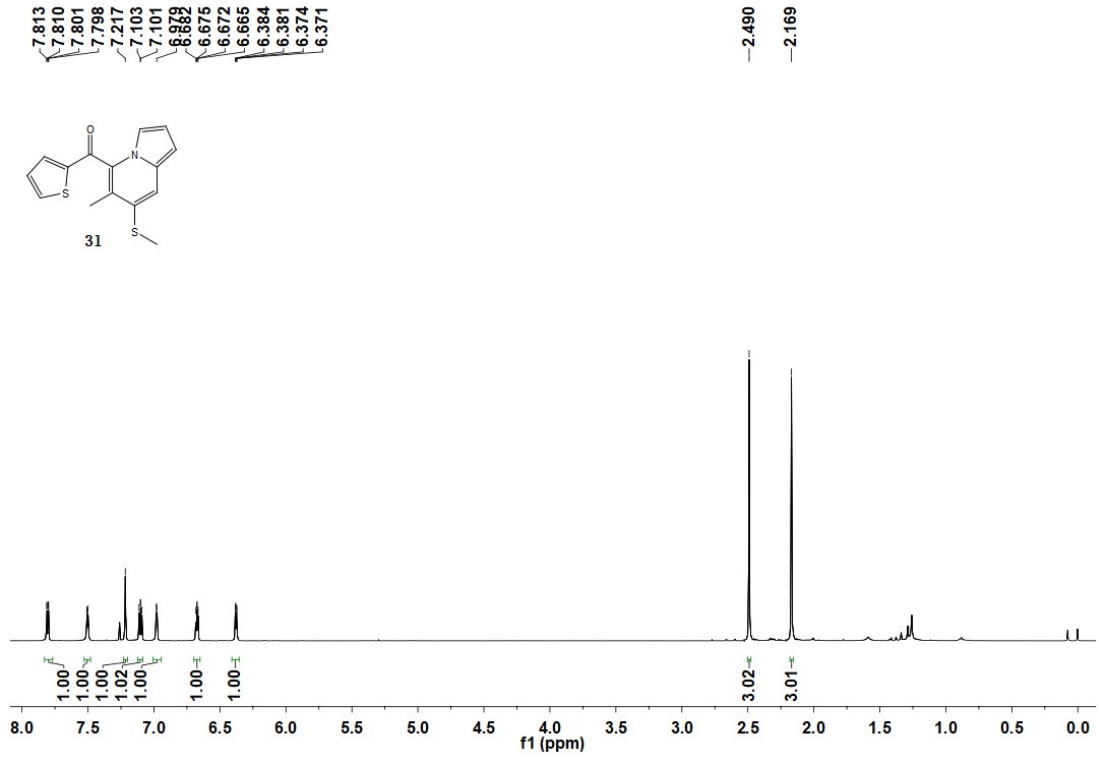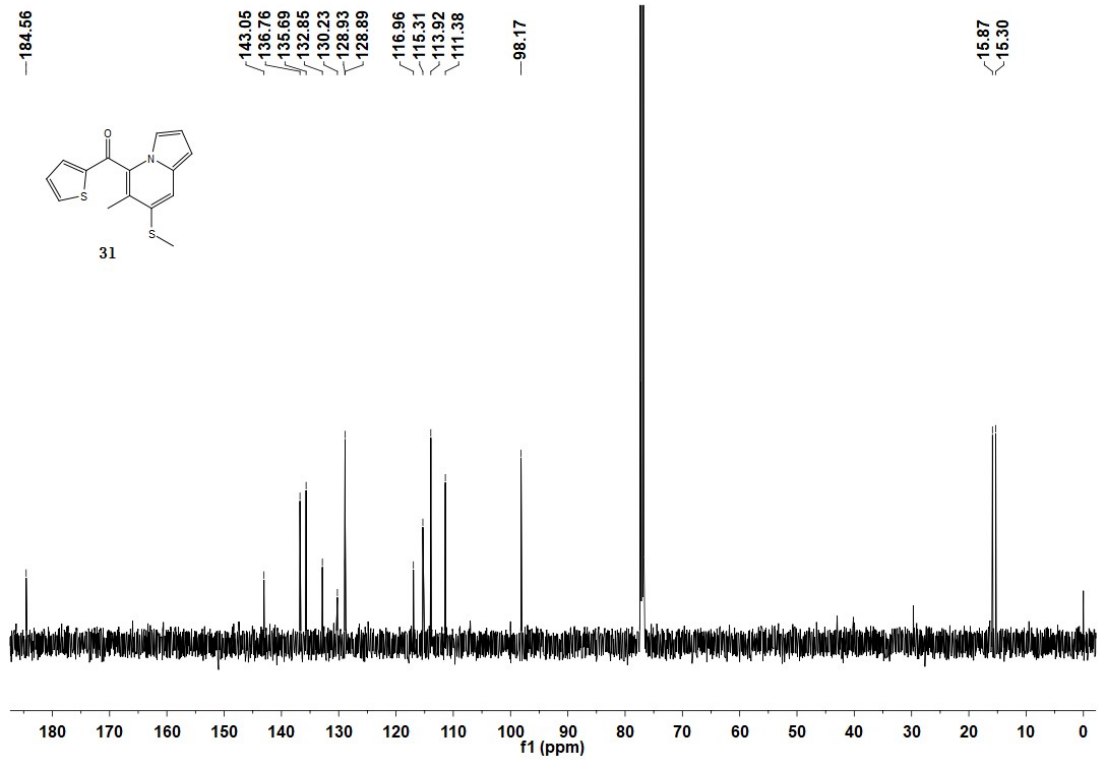

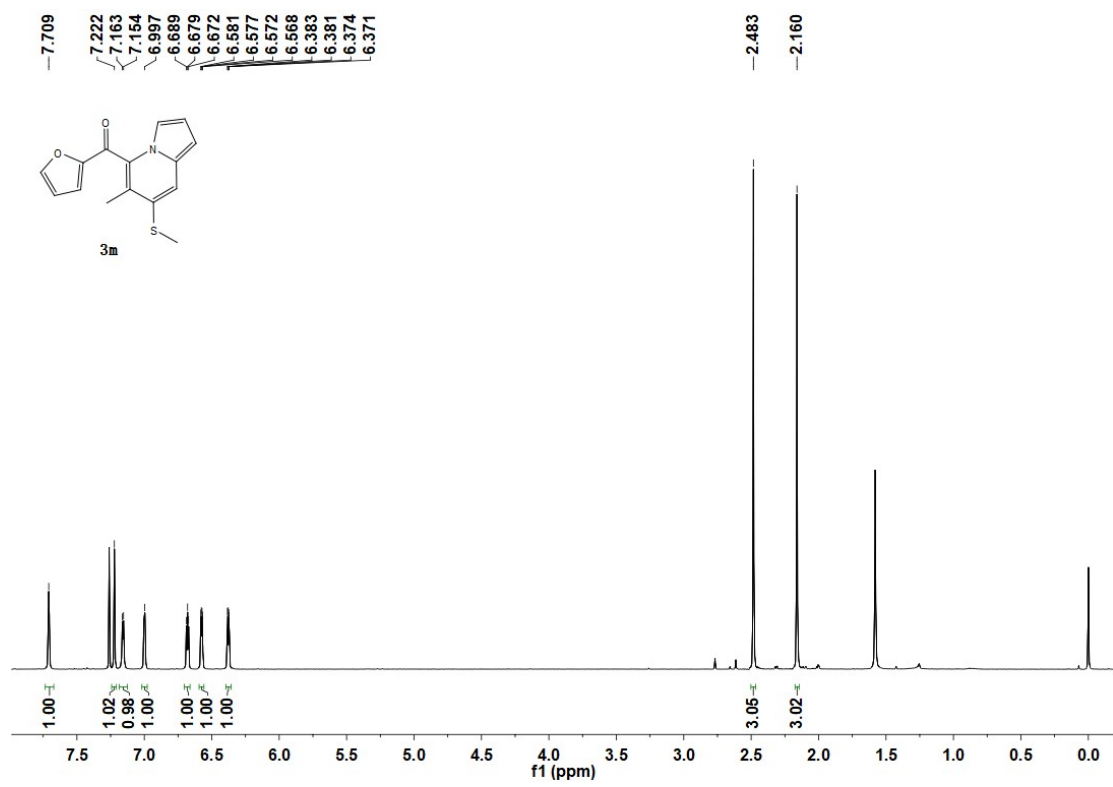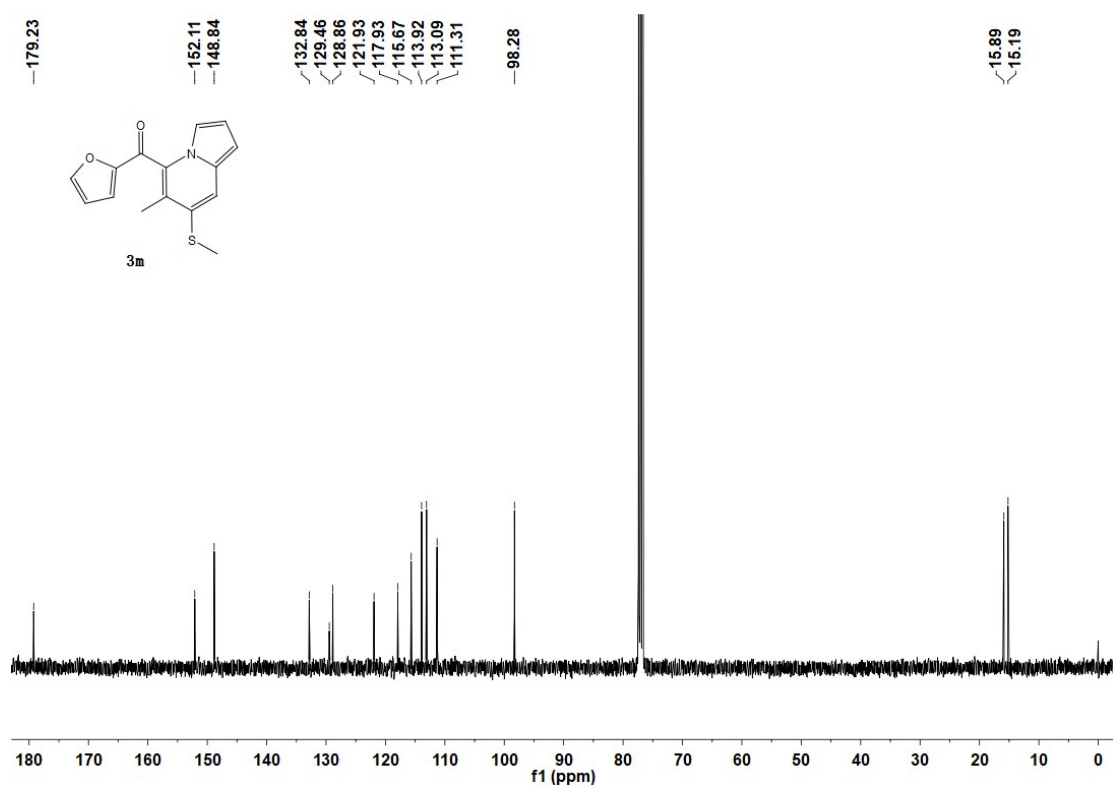

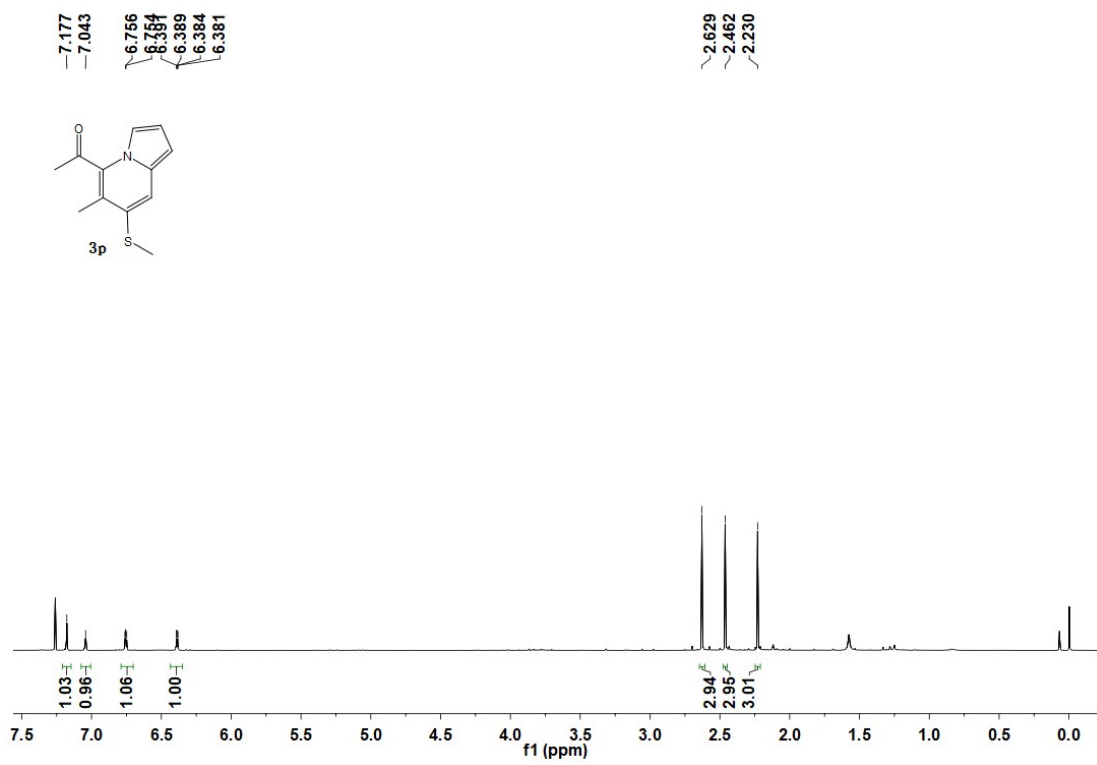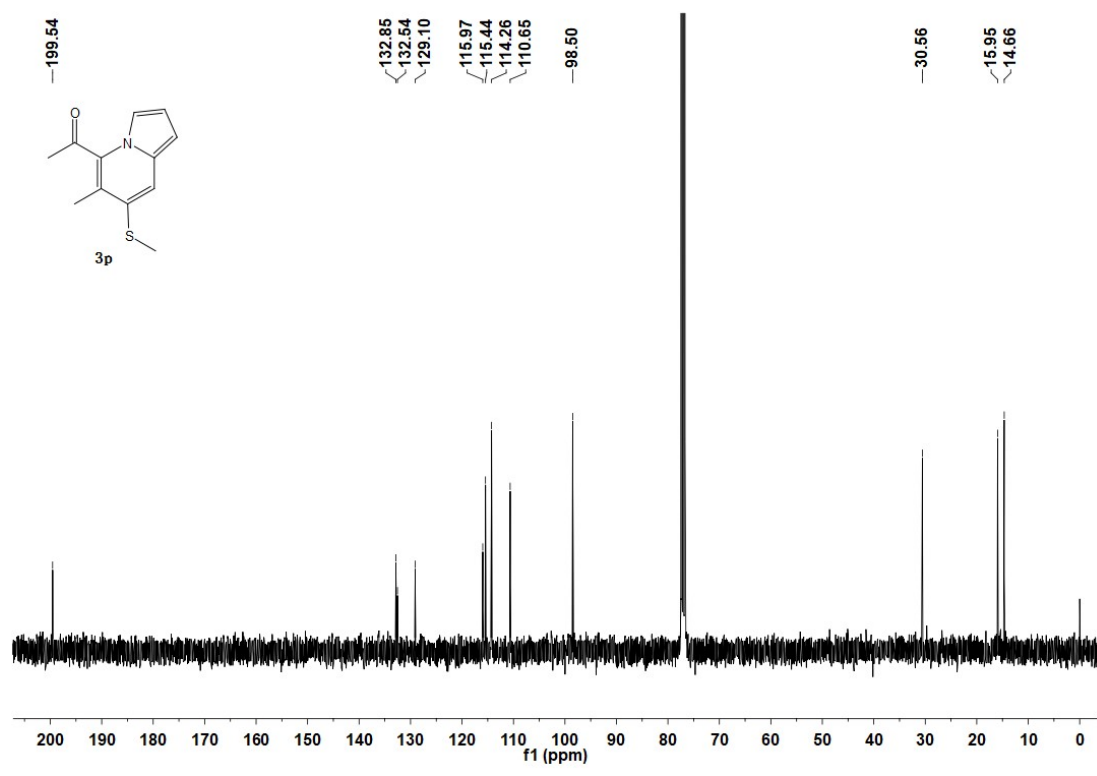

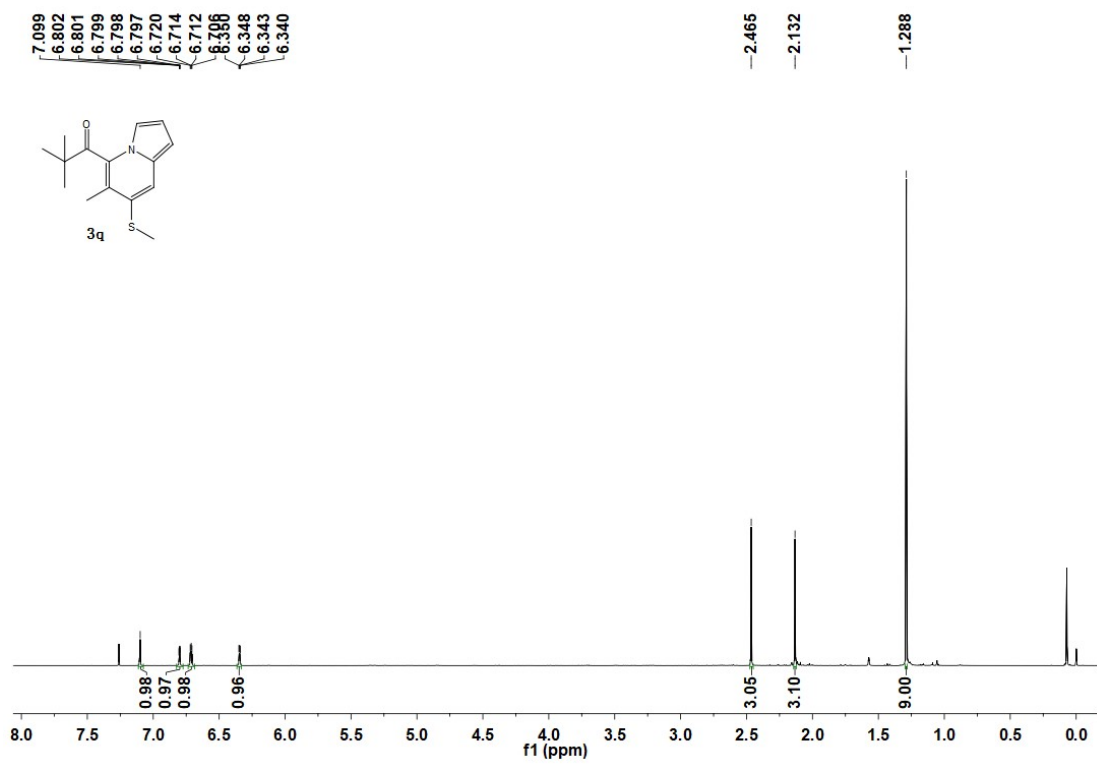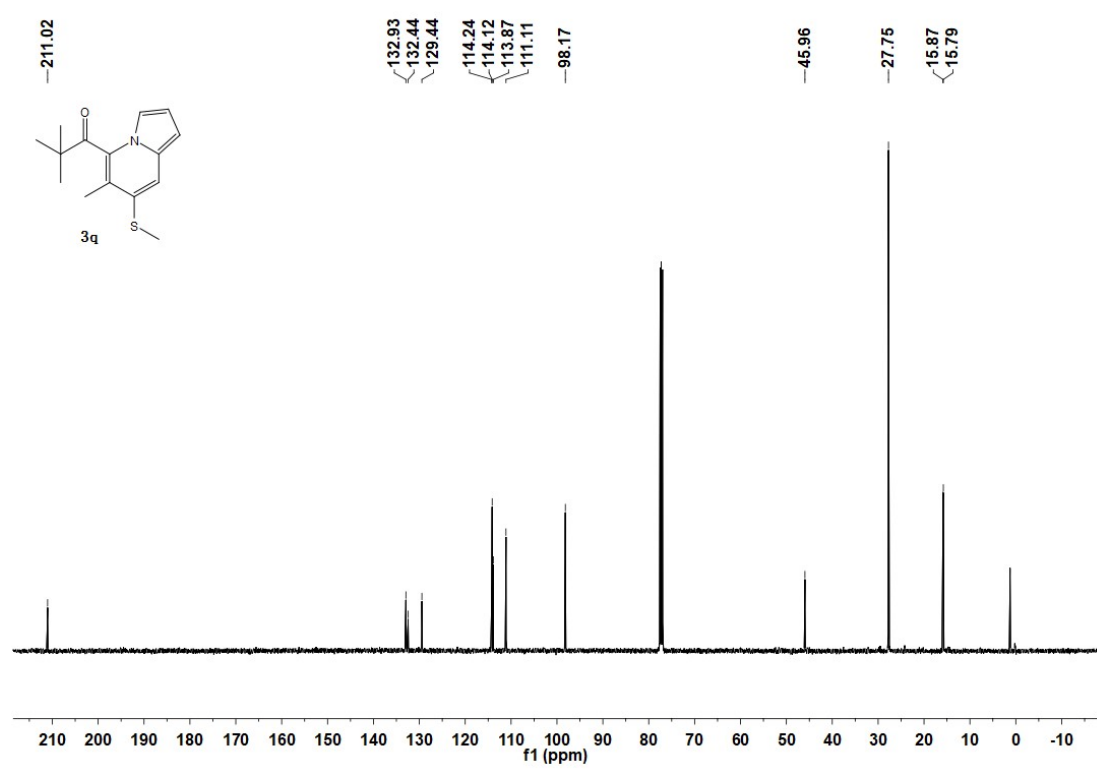



7.877  
7.863  
7.864  
7.639  
7.624  
7.492  
7.477  
7.461  
6.837  
6.664  
6.415

2.944  
2.929  
2.914  
2.900

2.134

1.393  
1.378  
1.363

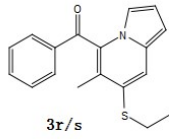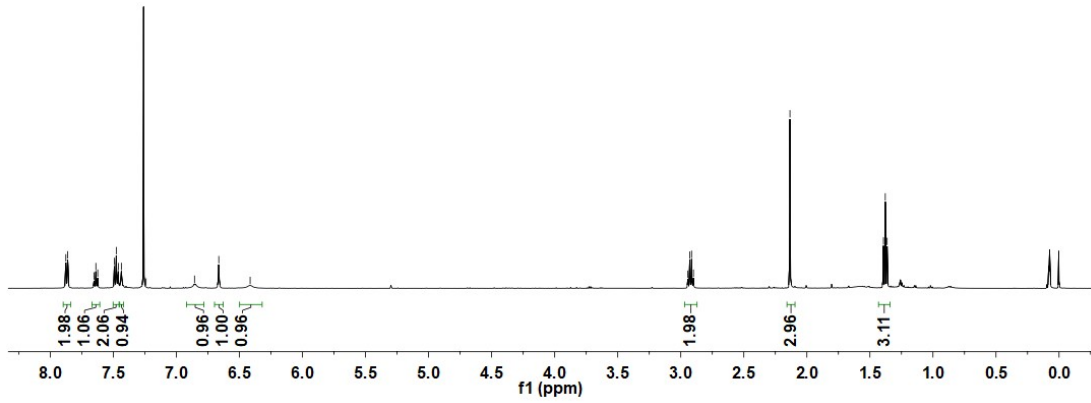

192.72

135.58  
134.76  
132.63  
130.31  
129.65  
129.32  
126.59  
119.33  
118.37  
114.07  
111.80

98.69

27.75

15.49  
13.86

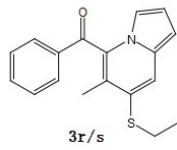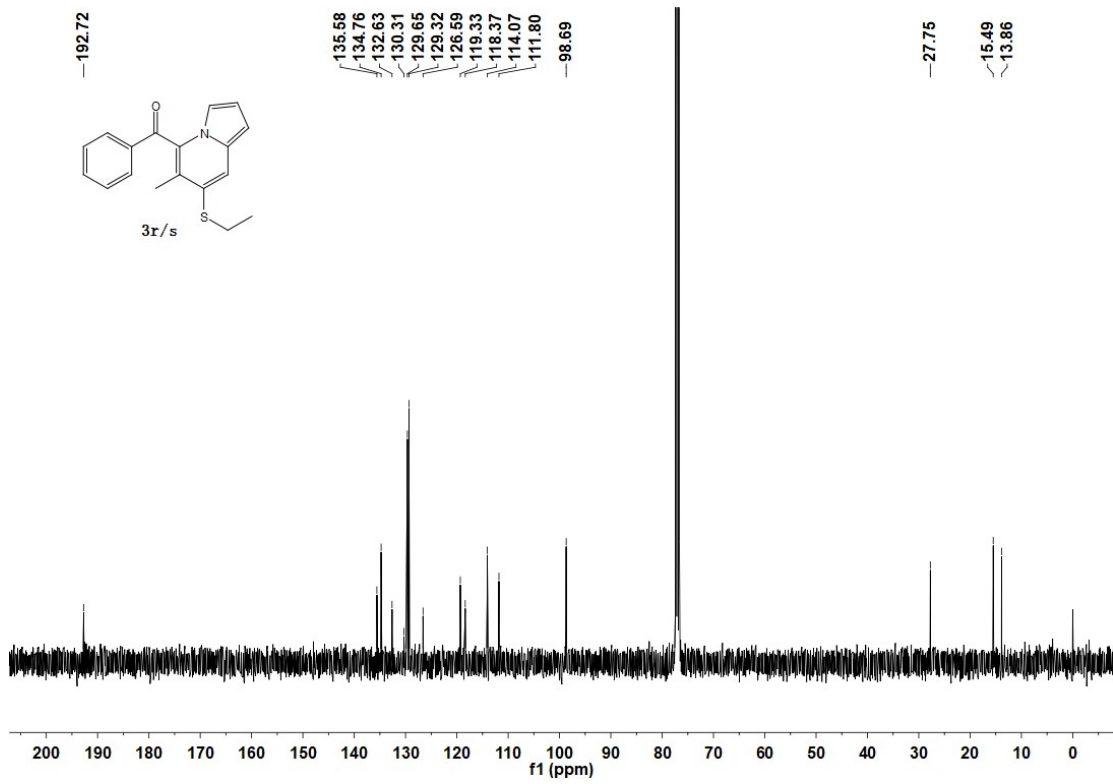

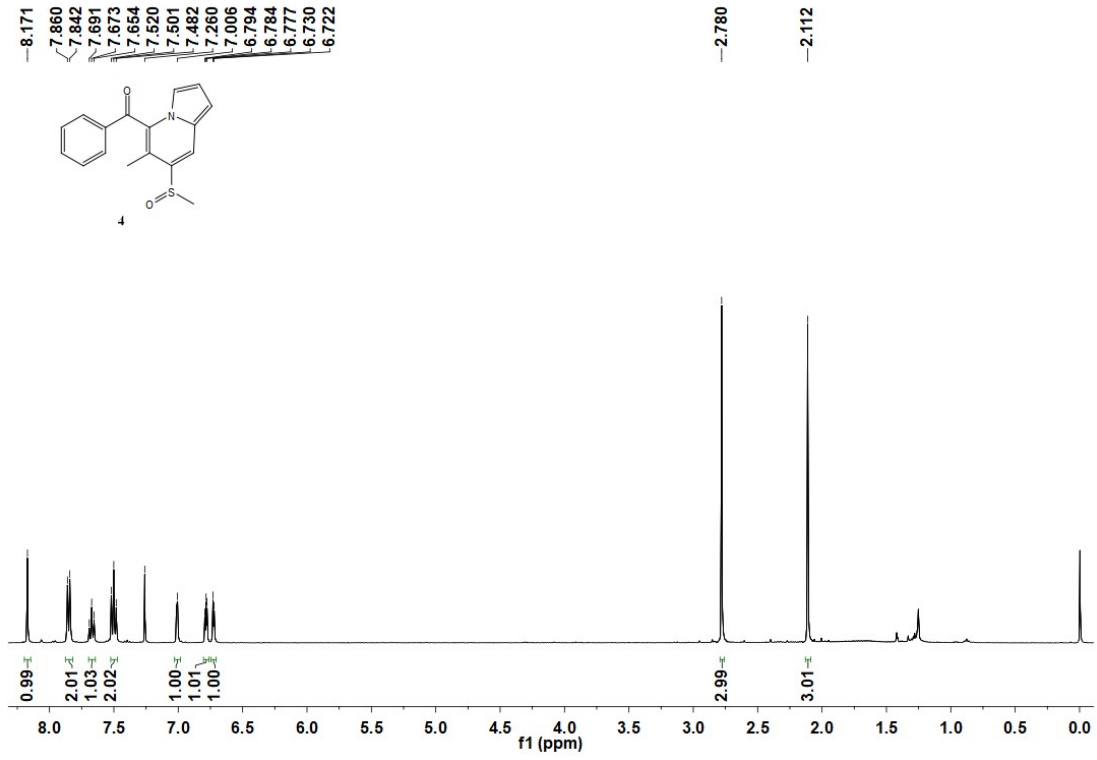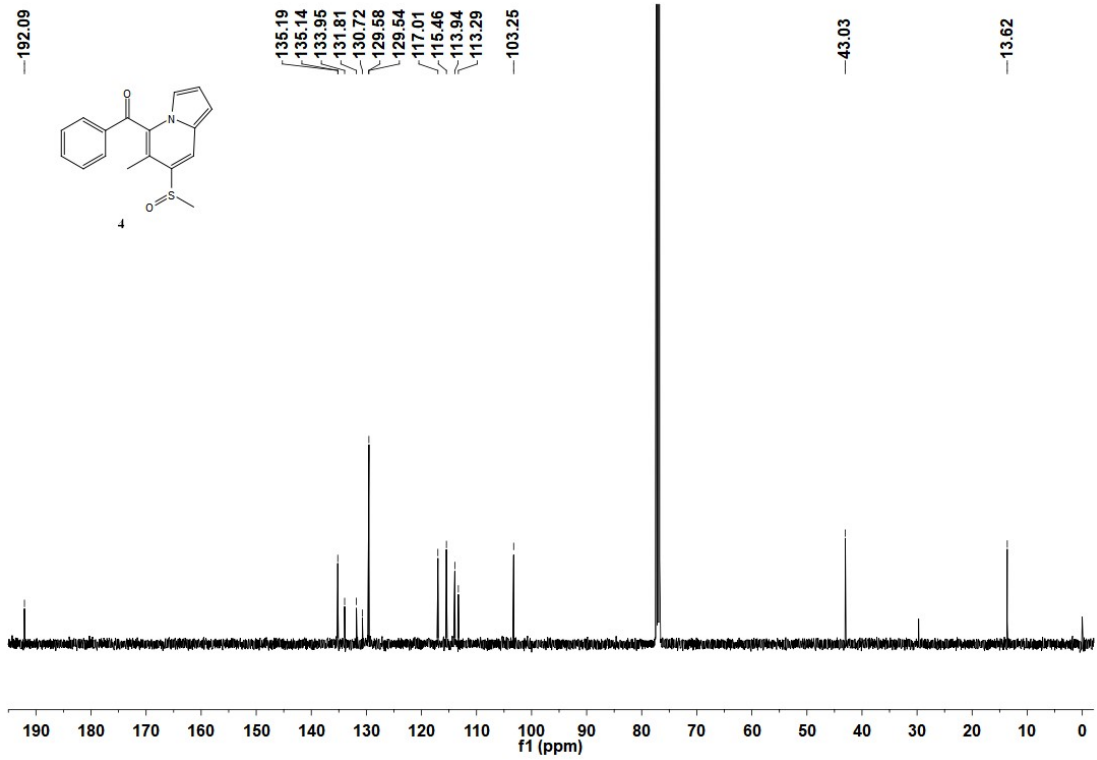

Supplement: d1nj04079k1.pdf [file d1nj04079k1.pdf]
